# Supplementary material for: Synthesis of a class of binaphthyl monophosphine ligands with a naphthofuran skeleton and their applications in Suzuki–Miyaura coupling reactions
Source: Royal Society of Chemistry journal article supplement (doi:10.1039/c8nj00412a), 2018-01-01

# Synthesis of a class of binaphthyl monophosphine ligands with a naphthofuran skeleton and their applications in Suzuki-Miyaura coupling reactions

Zihong Zhou, Hao Liang, Wang Xia, Huixuan Chen, Yaqi Zhang, Xuefeng He, Sifan Yu, Rihui Cao, and Liqin Qiu\*<sup>a</sup>

<sup>a</sup> School of Chemistry, the Key Laboratory of Low-carbon Chemistry & Energy Conservation of Guangdong Province, South China Sea Bio-Resource Exploitation and Utilization Collaborative Innovation Center, Sun Yat-sen University, No. 135 Xingangxi Road, Guangzhou 510275, People's Republic of China.

## 1. General Methods

All the reactions were carried out under an N<sub>2</sub> atmosphere using standard Schlenk techniques, and unless otherwise noted, materials were purchased from commercial suppliers and used without further purification. Column chromatography was performed on silica gel (200-300 mesh). Anhydrous DCM, DIPEA, DMSO, Et<sub>3</sub>N, pyridine and DMF were distilled from CaH<sub>2</sub> under an atmosphere of argon, anhydrous toluene and THF were distilled from Na under an atmosphere of argon. All <sup>1</sup>H NMR, <sup>13</sup>C NMR and <sup>31</sup>P NMR spectra were recorded on a Bruker 400 MHz NMR spectrometer in CDCl<sub>3</sub>, and chemical shifts (δ) are reported in ppm relative to TMS (δ 0.00 ppm) for the <sup>1</sup>H NMR and to chloroform (δ 77.0 ppm) for the <sup>13</sup>C NMR measurements and to an external standard (0 ppm for 85% H<sub>3</sub>PO<sub>4</sub>, <sup>31</sup>P NMR). HR-MS were carried out on a Bruker APEX 47e ESI FT-ICR mass spectrometer and Thermo MAT95XP EI-FAB-CI mass spectro-meter. Optical rotations were recorded on a Perkin-Elmer Model 341 polarimeter in a 10-cm cell at 20 °C. Compounds **2**, **3** and **4** were synthesized by the reported procedure.<sup>1,2,3</sup>

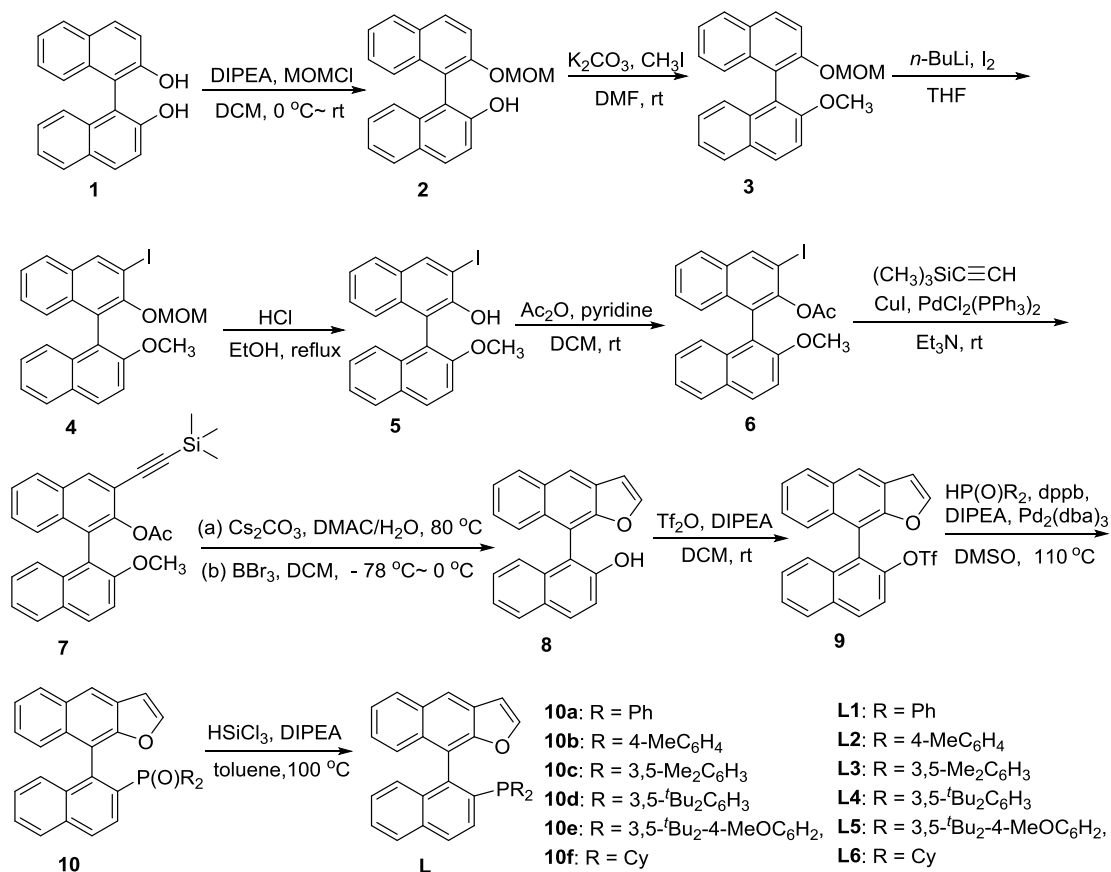

## 2. Preparation of Biaryl Monophosphine Ligands

**3-iodo-2'-methoxy-[1,1'-binaphthalen]-2-ol (5):** A 250 mL round-bottom flask was charged with **4** (4.70 g, 10.0 mmol), EtOH (100 mL) and 30 mL of *conc.* HCl. The resulting solution was stirred at 85 °C for 6 h and then concentrated on a rotary evaporator. The aqueous phase was extracted with EtOAc (3 × 30 mL) and the combined organic extract was successively washed with brine (40 mL), dried over anhydrous MgSO<sub>4</sub>, filtered, concentrated under reduced pressure. The crude reaction mixture was further purified by flash chromatography on silica gel with petroleum ether and ethyl acetate (4/1 v/v) as the eluting agent to afford **5** (3.87 g, 91% yield) as a white solid. <sup>1</sup>H NMR (400 MHz, CDCl<sub>3</sub>) δ 8.48 (1H, s), 8.10 (1H, d, *J* = 12.0 Hz), 7.93 (1H, d, *J* = 8.0 Hz), 7.80 (1H, d, *J* = 8.0 Hz), 7.52 (1H, d, *J* = 12.0 Hz), 7.38 (1H, t, *J* = 8.0 Hz), 7.34-7.31 (2H, m), 7.27-7.22 (1H, m), 7.15 (1H, d, *J* = 8.0 Hz), 7.05 (1H, d, *J* = 8.0 Hz), 5.41 (1H, s), 3.83 (3H, s). <sup>13</sup>C NMR (101 MHz, CDCl<sub>3</sub>) δ 156.6, 149.3, 138.9, 133.7, 133.6, 131.2, 130.5, 129.3, 128.2, 127.4, 127.0, 126.9, 125.0, 124.6, 124.2, 124.0, 123.2, 117.4, 115.5, 115.4, 113.5, 86.0, 56.6. HRMS (ESI) [M-H]<sup>-</sup>: calcd for C<sub>21</sub>H<sub>15</sub>IO<sub>2</sub>-H 425.0033, found 425.0034.

**3-iodo-2'-methoxy-[1,1'-binaphthalen]-2-yl acetate (6):** A 100 mL of round-bottom flask was charged with **5** (2.13 g, 5.0 mmol), Ac<sub>2</sub>O (2.4 mL, 25.0 mmol), pyridine (2.0 mL, 25.0 mmol) and DCM (20 mL). The resulting solution was stirred for 12 hour at room temperature, and then quenched with 40 mL of HCl (1M) solution, the layers were separated, and the aqueous layer was extracted with DCM (3 × 30 mL). The combined organic layer was successively washed with brine, dried over MgSO<sub>4</sub>, and concentrated. The crude reaction mixture was further purified by flash chromatography on silica gel with petroleum ether and ethyl acetate (3/1 v/v) as the eluting agent to afford **6** (2.18 g, 93% yield) as a white solid. <sup>1</sup>H NMR (400 MHz, CDCl<sub>3</sub>) δ 8.54 (1H, s), 8.03 (1H, d, *J* = 8.0 Hz), 7.86 (1H, t, *J* = 12.0 Hz), 7.50-7.44 (2H, m), 7.38-7.30 (3H, m), 7.26 (1H, t, *J* = 8.0 Hz), 7.15 (1H, d, *J* = 8.0 Hz), 3.81 (3H, s), 1.80 (3H, s). <sup>13</sup>C NMR (101 MHz, CDCl<sub>3</sub>) δ 167.9, 154.8, 146.5, 139.0, 130.4, 127.7, 127.0, 126.7, 126.3, 125.3, 123.8, 117.3, 113.4, 90.3, 56.7, 20.6. HRMS (ESI) [M+Na]<sup>+</sup>: calcd for C<sub>23</sub>H<sub>17</sub>IO<sub>3</sub>+Na<sup>+</sup> 491.0115, found 491.0119.

**2'-methoxy-3-((trimethylsilyl)ethynyl)-[1,1'-binaphthalen]-2-yl acetate (7):** To a solution of **6** (2.34 g, 5.0 mmol), CuI (9.5 mg, 0.05 mmol) and PdCl<sub>2</sub>(PPh<sub>3</sub>)<sub>2</sub> (350 mg, 0.5 mmol) in Et<sub>3</sub>N (30 mL) was added trimethylsilylacetylene (1.1 mL, 7.5 mmol) dropwise at 0 °C under argon. Then the resulting solution was stirred for overnight at room temperature. The reaction was monitored by TLC to confirm consumption of the starting materials. And then the solid was removed by filtration. The filtrate was treated with water and extracted with DCM, and the combined organic layer was successively washed with brine, dried over anhydrous MgSO<sub>4</sub> and concentrated. The crude reaction mixture was further purified by flash chromatography on silica gel with petroleum ether and ethyl acetate (10/1 v/v) as the eluting agent to afford **7** (1.91 g, 87% yield) as a white solid. <sup>1</sup>H NMR (400 MHz, CDCl<sub>3</sub>) δ 8.22 (1H, s), 8.02 (1H, d, *J* = 8.0 Hz), 7.89 (2H, t, *J* = 8.0 Hz), 7.49-7.41 (2H, m), 7.37-7.24 (3H, m), 7.21-7.15 (2H, m), 3.79 (3H, s), 1.87 (3H, s), 0.29 (9H, s). <sup>13</sup>C NMR (101 MHz, CDCl<sub>3</sub>) δ 168.0, 154.9, 146.9, 133.5, 131.3, 130.1, 128.9, 128.0, 127.7, 127.3, 126.6, 126.4, 126.1, 125.4, 123.7, 117.2, 116.7, 113.5, 100.7, 99.0, 56.7, 20.3, 0.06. HRMS (ESI) [M+Na]<sup>+</sup>: calcd for C<sub>28</sub>H<sub>26</sub>O<sub>3</sub>Si+Na<sup>+</sup> 461.1543, found 461.1549.

**1-(naphtho[2,3-b]furan-9-yl)naphthalen-2-ol (8):** To a solution of **7** (1.75 g, 4.0 mmol) in DMAC/H<sub>2</sub>O (50 mL/5 mL) was added Cs<sub>2</sub>CO<sub>3</sub> (5.22 g, 16.0 mmol), then the resulting solution was heated under anargon atmosphere at 70 °C for 24 h. After the mixture was cooled to room temperature, it was treated with water and extracted with EtOAc (3 × 40 mL), and the combined

organic layer was successively washed with brine, dried over anhydrous MgSO<sub>4</sub> and concentrated under reduced pressure. The crude product was dried under vacuum and then dissolved in anhydrous dichloromethane. The solution was cooled to -78°C, and BBr<sub>3</sub> (0.8 mL, 8.0 mmol) was added dropwise. After stirring the reaction system for 30 min at -78°C, 20 mL of ice-water was added dropwise. The reaction mixture was then warmed to room temperature, the aqueous layer was separated and re-extracted with DCM. The combined organic layer was successively washed with brine, dried over anhydrous MgSO<sub>4</sub> and concentrated. The crude reaction mixture was further purified by flash chromatography on silica gel with petroleum ether and ethyl acetate (4/1 v/v) as the eluting agent to afford **8** (521mg, 42% yield) as a white solid. <sup>1</sup>H NMR (400 MHz, CDCl<sub>3</sub>) δ 8.30 (1H, s), 8.12 (1H, d, *J* = 8.0 Hz), 8.02 (1H, d, *J* = 8.0 Hz), 7.94 (1H, d, *J* = 8.0 Hz), 7.67 (1H, s), 7.56-7.50 (2H, m), 7.44 (1H, d, *J* = 8.0 Hz), 7.40-7.35 (2H, m), 7.23 (1H, t, *J* = 4.0 Hz), 7.04-7.00 (2H, m). <sup>13</sup>C NMR (101 MHz, CDCl<sub>3</sub>) δ 152.8, 151.6, 147.9, 133.5, 131.1, 130.6, 130.4, 129.1, 128.6, 128.4, 128.2, 126.7, 126.0, 125.2, 124.7, 124.5, 123.5, 120.6, 117.5, 112.9, 111.0, 106.4. HRMS (ESI) [M-H]<sup>-</sup>: calcd for C<sub>22</sub>H<sub>14</sub>O<sub>2</sub>-H 309.0910, found 309.0918.

**1-(naphtho[2,3-b]furan-9-yl)naphthalen-2-yl trifluoromethanesulfonate (9):** Under an inert argon atmosphere, **8** (620 mg, 2.0 mmol) was dissolved in 30 mL of DCM, DIPEA (0.7 mL, 4.0 mmol) was added at 0 °C, followed by dropwise addition of 0.5 mL of Tf<sub>2</sub>O (3.0 mmol). The whole solution was stirred for 8 h at room temperature and then quenched by water (20 mL). The layers were separated and the aqueous layer was extracted with DCM. The combined organic layer was successively washed with brine, dried over anhydrous MgSO<sub>4</sub> and concentrated. The crude reaction mixture was further purified by flash chromatography on silica gel with petroleum ether and ethyl acetate (50/1 v/v) as the eluting agent to afford **9** (813mg, 92% yield) as a white solid. <sup>1</sup>H NMR (400 MHz, CDCl<sub>3</sub>) δ 8.31 (1H, s), 8.17 (1H, d, *J* = 8.0 Hz), 8.11 (1H, d, *J* = 8.0 Hz), 8.06 (1H, d, *J* = 8.0 Hz), 7.69-7.67 (2H, m), 7.62-7.58 (1H, m), 7.50-7.47 (1H, m), 7.39-7.34 (4H, m), 7.00 (1H, d). <sup>13</sup>C NMR (101 MHz, CDCl<sub>3</sub>) δ 152.3, 147.6, 145.8, 132.6, 131.0, 130.6, 128.5, 128.3, 127.7, 127.1, 126.8, 125.6, 125.3, 124.1, 120.8, 119.6, 116.5, 110.6, 106.3.

**(1-(naphtho[2,3-b]furan-9-yl)naphthalen-2-yl)diphenylphosphine oxide (10a):** A 100 mL of round-bottom flask charged with a mixture of **9** (663 mg, 1.5 mmol), diphenylphosphine oxide (364 mg, 1.8 mmol), 1,4-bis(diphenylphosphino)butane (dppb) (32.0 mg, 0.075 mmol), Pd<sub>2</sub>(dba)<sub>3</sub> (68.7 mg, 0.075 mmol) and DIPEA (1.0 mL, 6 mmol) in 10 mL of DMSO was heated to 110 °C

for 36 h under argon atmosphere. Then the mixture was cooled to room temperature, diluted with water (50 mL) and extracted with EtOAc (3 × 30 mL). The combined organic layer was successively washed with brine, dried over anhydrous MgSO<sub>4</sub> and concentrated. The crude reaction mixture was further purified by flash chromatography on silica gel with petroleum ether and ethyl acetate (1/1 v/v) as the eluting agent to afford **10a** (527mg, 71% yield) as a white solid. <sup>1</sup>H NMR (400 MHz, CDCl<sub>3</sub>) δ 8.12 (1H, d, *J* = 8.0 Hz), 8.04-7.98 (2H, m), 7.88 (1H, s), 7.81 (1H, d, *J* = 8.0 Hz), 7.56 (1H, t, *J* = 8.0 Hz), 7.48-7.43 (3H, m), 7.38-7.30 (2H, m), 7.25-7.10 (8H, m), 7.03 (1H, d, *J* = 12.0 Hz), 6.94 (2H, t, *J* = 8.0 Hz), 6.76 (1H, m). <sup>13</sup>C NMR (101 MHz, CDCl<sub>3</sub>) δ 152.0, 147.0, 138.1, 134.9, 133.2, 133.1, 132.7, 132.2, 131.7, 131.5, 131.1, 131.0, 130.9, 130.6, 130.5, 130.1, 129.1, 128.5, 128.1, 127.8, 127.6, 127.4, 127.2, 127.1, 127.0, 126.1, 124.9, 123.7, 120.2, 115.3, 106.1. <sup>31</sup>P NMR (162 MHz, CDCl<sub>3</sub>) δ 28.4. HRMS (ESI) [M+H]<sup>+</sup>: calcd for C<sub>34</sub>H<sub>23</sub>O<sub>2</sub>P+H<sup>+</sup> 495.1508, found 495.1527

**(1-(naphtho[2,3-b]furan-9-yl)naphthalen-2-yl)di-*p*-tolylphosphine oxide (10b):** This compound was prepared with the same method as described above. Yield (75%), <sup>1</sup>H NMR (400 MHz, CDCl<sub>3</sub>) δ 8.11-8.05 (2H, m), 7.09 (1H, d, *J* = 8.0 Hz), 7.89 (1H, s), 7.80 (1H, d, *J* = 8.0 Hz), 7.55 (1H, t, *J* = 8.0 Hz), 7.47-7.30 (4H, m), 7.23-7.18 (3H, m), 7.05-6.77 (6H, m), 6.68 (1H, d, *J* = 8.0 Hz), 2.29 (3H, s), 2.19 (3H, s). <sup>13</sup>C NMR (101 MHz, CDCl<sub>3</sub>) δ 152.0, 147.0, 141.3, 137.6, 134.8, 132.1, 131.5, 130.8, 130.2, 129.2, 129.1, 128.5, 128.3, 128.1, 127.9, 127.8, 127.0, 126.2, 124.9, 123.7, 119.5, 115.4, 105.9, 21.4, 21.3. <sup>31</sup>P NMR (162 MHz, CDCl<sub>3</sub>) δ 28.8. HRMS (ESI) [M+H]<sup>+</sup>: calcd for C<sub>36</sub>H<sub>27</sub>O<sub>2</sub>P+H<sup>+</sup> 523.1821, found 523.1837.

**bis(3,5-dimethylphenyl)(1-(naphtho[2,3-b]furan-9-yl)naphthalen-2-yl)phosphine oxide (10c):** This compound was prepared with the same method as described above. Yield (69%), <sup>1</sup>H NMR (400 MHz, CDCl<sub>3</sub>) δ 8.14-8.10 (2H, m), 8.00 (1H, d, *J* = 8.0 Hz), 7.87 (1H, s), 7.81 (1H, d, *J* = 8.0 Hz), 7.57-7.52 (2H, m), 7.33-7.31 (1H, m), 7.23-7.19 (3H, m), 7.06-7.03 (2H, m), 6.98 (1H, d, *J* = 8.0 Hz), 6.87 (1H, s), 6.80 (1H, s), 6.73-6.68 (3H, m), 2.15 (6H, s), 2.01 (6H, s). <sup>13</sup>C NMR (101 MHz, CDCl<sub>3</sub>) δ 152.1, 146.9, 137.2(d), 136.7, 134.8, 132.8, 132.6, 130.8, 130.0, 129.3, 129.2(d), 129.0, 128.8, 128.7, 128.5, 128.1, 127.9, 127.6, 127.2, 127.0, 126.2, 124.6, 123.7, 123.0, 115.5, 106.0, 21.2. <sup>31</sup>P NMR (162 MHz, CDCl<sub>3</sub>) δ 28.9. HRMS (ESI) [M+Na]<sup>+</sup>: calcd for C<sub>38</sub>H<sub>31</sub>O<sub>2</sub>P+Na<sup>+</sup> 573.1954, found 573.1955.

**bis(3,5-di-*tert*-butylphenyl)(1-(naphtho[2,3-b]furan-9-yl)naphthalen-2-yl)phosphine oxide**

**(10d):** This compound was prepared with the same method as described above. Yield (63%), <sup>1</sup>H NMR (400 MHz, CDCl<sub>3</sub>) δ 8.05 (1H, d, *J* = 8.0 Hz), 7.98-7.97 (2H, m), 7.85-7.75 (2H, m), 7.55-7.50 (2H, m), 7.37-7.28 (6H, m), 7.24-7.18 (2H, m), 7.15-7.09 (2H, m), 6.96 (1H, d, *J* = 8.0 Hz), 6.79 (1H, m), 1.21 (36H, d, *J* = 12.0 Hz). <sup>13</sup>C NMR (101 MHz, CDCl<sub>3</sub>) δ 152.5, 149.8, 147.3, 138.6, 134.7, 133.4, 132.6, 131.6, 130.9, 129.7, 129.1, 128.0, 127.9, 127.7, 127.3, 127.0, 126.2, 125.7, 125.5, 124.7, 123.5, 119.8, 115.6, 106.9, 34.8, 31.3, 29.7. <sup>31</sup>P NMR (162 MHz, CDCl<sub>3</sub>) δ 28.4. HRMS (ESI) [M+H]<sup>+</sup>: calcd for C<sub>50</sub>H<sub>55</sub>O<sub>2</sub>P+H<sup>+</sup> 719.4012, found 719.4005.

**bis(3,5-di-*tert*-butyl-4-methoxyphenyl)(1-(naphtho[2,3-*b*]furan-9-yl)naphthalen-2-yl)phosphine oxide (10e):** This compound was prepared with the same method as described above. Yield (61%), <sup>1</sup>H NMR (400 MHz, CDCl<sub>3</sub>) δ 8.10 (1H, d, *J* = 12.0 Hz), 8.00-7.94 (3H, m), 7.85 (1H, d, *J* = 8.0 Hz), 7.55-7.49 (2H, m), 7.33-7.19 (3H, m), 7.16-7.13 (5H, m), 6.85-6.79 (2H, m), 3.63 (6H, d), 1.27 (18H, s), 1.22 (18H, s). <sup>13</sup>C NMR (101 MHz, CDCl<sub>3</sub>) δ 161.9, 152.4, 147.2, 143.0, 142.7, 137.7, 134.6, 133.2, 132.6, 131.6, 131.1, 130.4, 130.3, 129.8, 129.3, 128.1, 127.6, 127.3, 126.9, 126.5, 126.2, 124.9, 123.7, 119.7, 115.8, 106.1, 64.2, 64.0, 35.7, 31.8. <sup>31</sup>P NMR (162 MHz, CDCl<sub>3</sub>) δ 30.0. HRMS (ESI) [M+H]<sup>+</sup>: calcd for C<sub>52</sub>H<sub>59</sub>O<sub>4</sub>P+H<sup>+</sup> 779.4224, found 779.4224.

**dicyclohexyl(1-(naphtho[2,3-*b*]furan-9-yl)naphthalen-2-yl)phosphine oxide (10f):** This compound was prepared with the same method as described above. Yield (51%), <sup>1</sup>H NMR (400 MHz, CDCl<sub>3</sub>) δ 8.27 (1H, s), 8.21 (1H, t, *J* = 8.0 Hz), 8.15 (1H, d, *J* = 8.0 Hz), 8.09 (1H, d, *J* = 8.0 Hz), 8.01 (1H, d, *J* = 8.0 Hz), 7.60 (1H, s), 7.54 (1H, t, *J* = 8.0 Hz), 7.45 (1H, t, *J* = 8.0 Hz), 7.27-7.20 (3H, m), 7.06-7.01 (2H, m), 1.74-1.45 (9H, m), 1.30-0.91 (13H, m). <sup>13</sup>C NMR (101 MHz, CDCl<sub>3</sub>) δ 152.2, 147.2, 136.8, 134.5, 133.4, 133.3, 131.3, 131.0, 130.4, 130.2, 128.4, 128.1, 127.8, 127.6, 126.9, 126.8, 126.0, 125.2, 124.0, 119.6, 116.6, 106.7, 37.7, 37.5, 37.1, 36.9, 26.7, 26.6, 26.4, 26.3, 26.2, 26.1, 26.0, 25.9, 25.8, 25.7, 25.5. <sup>31</sup>P NMR (162 MHz, CDCl<sub>3</sub>) δ 47.9. HRMS (ESI) [M+H]<sup>+</sup>: calcd for C<sub>34</sub>H<sub>35</sub>O<sub>2</sub>P+H<sup>+</sup> 507.2447, found 507.2447.

**(1-(naphtho[2,3-*b*]furan-9-yl)naphthalen-2-yl)diphenylphosphine (L1):** To a mixture of **10a** (495 mg, 1.0 mmol) and DIPEA (3.5 mL, 20.0 mmol) in 20 mL of degassed anhydrous toluene at 0 °C under argon was added HSiCl<sub>3</sub> (1.00 mL, 10.0 mmol). After stirring at 0 °C for 30 min, the mixture was heated at 110 °C for 12 h. Cooling the reaction system to 0 °C, the mixture was diluted with ether and quenched with 5 drops of NaOH (2 M) solution and dried over MgSO<sub>4</sub>, filtered, concentrated under reduced pressure, The residue was purified by flash chromatography

on silica gel, eluting with *n*-hexanes/Et<sub>2</sub>O (50:1, v/v), to produce **L1** as a white solid (383 mg, 83%). <sup>1</sup>H NMR (400 MHz, CDCl<sub>3</sub>) δ 8.22 (1H, s), 8.06 (1H, d, *J* = 8.0 Hz), 7.98-7.94 (2H, m), 7.50-7.47 (2H, m), 7.41 (1H, t, *J* = 8.0 Hz), 7.34-7.23 (7H, m), 7.21-7.11 (8H, m), 6.86-6.85 (1H, m). <sup>13</sup>C NMR (101 MHz, CDCl<sub>3</sub>) δ 147.4, 133.7, 133.6, 133.4, 130.4, 130.1, 128.6, 128.2, 128.1, 128.0, 127.6, 126.8, 126.6, 126.5, 125.8, 124.9, 124.7, 123.8, 113.4, 106.0. <sup>31</sup>P NMR (162 MHz, CDCl<sub>3</sub>) δ -12.9. HRMS (ESI) [M+H]<sup>+</sup>: calcd for C<sub>34</sub>H<sub>23</sub>OP+H<sup>+</sup> 479.1559, found 479.1558.

**(1-(naphtho[2,3-b]furan-9-yl)naphthalen-2-yl)di-*p*-tolylphosphine (L2):** This compound was prepared with the same method as described above. Yield (85%), <sup>1</sup>H NMR (400 MHz, CDCl<sub>3</sub>) δ 8.23 (1H, s), 8.07 (1H, d, *J* = 8.0 Hz), 7.98-7.94 (2H, m), 7.57-7.54 (1H, m), 7.50 (1H, t, *J* = 8.0 Hz), 7.44-7.38 (2H, m), 7.30-7.17 (4H, m), 7.13-7.04 (8H, m), 6.88 (1H, m), 2.35 (3H, s), 2.33 (3H, s). <sup>13</sup>C NMR (101 MHz, CDCl<sub>3</sub>) δ 152.4, 147.3, 139.5, 139.1, 138.0, 137.7, 137.6, 137.5, 134.3, 134.2, 134.0, 133.6, 133.4, 133.1, 130.8, 130.4, 130.0, 129.0, 128.8, 128.5, 128.2, 128.0, 127.7, 126.6, 126.5, 125.9, 124.9, 123.7, 119.3, 117.7, 106.0, 21.3. <sup>31</sup>P NMR (162 MHz, CDCl<sub>3</sub>) δ -14.3. HRMS (ESI) [M+H]<sup>+</sup>: calcd for C<sub>36</sub>H<sub>27</sub>OP+H<sup>+</sup> 507.1872, found 507.1872.

**bis(3,5-dimethylphenyl)(1-(naphtho[2,3-b]furan-9-yl)naphthalen-2-yl)phosphine (L3):** This compound was prepared with the same method as described above. Yield (79%), <sup>1</sup>H NMR (400 MHz, CDCl<sub>3</sub>) δ 8.21 (1H, s), 8.05 (1H, d, *J* = 8.0 Hz), 7.97-7.93 (2H, m), 7.59-7.56 (1H, m), 7.49 (1H, t, *J* = 8.0 Hz), 7.42-7.37 (2H, m), 7.25-7.21 (2H, m), 7.17-7.14 (2H, m), 6.90-6.89 (2H, m), 6.83-6.81 (3H, m), 6.74-6.72 (2H, m), 2.22 (6H, s), 2.17 (6H, s). <sup>13</sup>C NMR (101 MHz, CDCl<sub>3</sub>) δ 152.3, 147.3, 139.4, 139.0, 137.9, 137.7, 137.3, 137.2, 137.1, 137.0, 133.6, 133.0, 131.5, 131.3, 131.1, 130.5, 130.1, 130.0, 129.8, 128.5, 128.1, 128.0, 127.6, 126.6, 126.5, 126.4, 126.0, 124.6, 123.7, 119.3, 117.8, 106.0, 21.3, 21.2. <sup>31</sup>P NMR (162 MHz, CDCl<sub>3</sub>) δ -11.7. HRMS (ESI) [M+H]<sup>+</sup>: calcd for C<sub>38</sub>H<sub>31</sub>OP+H<sup>+</sup> 535.2185, found 535.2185.

**bis(3,5-di-*tert*-butylphenyl)(1-(naphtho[2,3-b]furan-9-yl)naphthalen-2-yl)phosphine (L4):** This compound was prepared with the same method as described above. Yield (89%), <sup>1</sup>H NMR (400 MHz, CDCl<sub>3</sub>) δ 8.23 (1H, s), 8.04 (1H, d, *J* = 8.0 Hz), 7.96-7.94 (2H, m), 7.58 (1H, d, *J* = 8.0 Hz), 7.51-7.46 (2H, m), 7.37 (1H, t, *J* = 8.0 Hz), 7.30 (1H, s), 7.25-7.21 (3H, m), 7.15-7.09 (4H, m), 7.01 (2H, d, *J* = 8.0 Hz), 6.91 (1H, m), 1.24 (18H, s), 1.20 (18H, s). <sup>13</sup>C NMR (101 MHz, CDCl<sub>3</sub>) δ 152.3, 149.9, 149.8, 147.4, 139.6, 139.3, 138.4, 138.2, 137.0, 136.6, 133.6, 133.0, 131.0, 130.4, 128.2, 128.0, 127.7, 127.5, 126.6, 126.4, 126.3, 126.0, 124.7, 123.6, 122.0, 121.7,

119.2, 106.1, 34.8, 31.4.  $^{31}\text{P}$  NMR (162 MHz,  $\text{CDCl}_3$ )  $\delta$  -10.1. HRMS (ESI)  $[\text{M}+\text{H}]^+$ : calcd for  $\text{C}_{50}\text{H}_{55}\text{OP}+\text{H}^+$  703.4063, found 703.4064.

**bis(3,5-di-*tert*-butyl-4-methoxyphenyl)(1-(naphtho[2,3-*b*]furan-9-yl)naphthalen-2-yl)phosphine (L5):** This compound was prepared with the same method as described above. Yield (87%),  $^1\text{H}$  NMR (400 MHz,  $\text{CDCl}_3$ )  $\delta$  8.21 (1H, s), 8.02-7.94 (3H, m), 7.52-7.46 (3H, m), 7.34 (1H, t,  $J = 8.0$  Hz), 7.23 (1H, t,  $J = 8.0$  Hz), 7.14 (2H, d,  $J = 8.0$  Hz), 7.08-7.03 (3H, m), 6.93-6.91 (3H, m), 3.67 (3H, s), 3.63 (3H, s), 1.32 (18H, s), 1.26 (18H, s).  $^{13}\text{C}$  NMR (101 MHz,  $\text{CDCl}_3$ )  $\delta$  159.6, 159.5, 152.2, 147.3, 142.8, 139.2, 138.9, 138.4, 138.3, 137.7, 133.5, 133.0, 132.3, 132.1, 132.0, 131.8, 131.3, 131.2, 130.8, 130.7, 130.4, 130.0, 128.1, 128.0, 126.5, 126.4, 126.3, 125.9, 124.6, 123.6, 119.2, 117.8, 106.1, 64.1, 35.7, 35.6, 32.0, 31.9, 22.6, 14.1.  $^{31}\text{P}$  NMR (162 MHz,  $\text{CDCl}_3$ )  $\delta$  -12.4. HRMS (ESI)  $[\text{M}+\text{H}]^+$ : calcd for  $\text{C}_{52}\text{H}_{59}\text{O}_3\text{P}+\text{H}^+$  763.4275, found 763.4284.

**dicyclohexyl(1-(naphtho[2,3-*b*]furan-9-yl)naphthalen-2-yl)phosphine (L6):** This compound was prepared with the same method as described above. Yield (84%),  $^1\text{H}$  NMR (400 MHz,  $\text{CDCl}_3$ )  $\delta$  8.23 (1H, s), 8.07-8.01 (2H, m), 7.98 (1H, d,  $J = 12.0$  Hz), 7.88 (1H, d,  $J = 12.0$  Hz), 7.60 (1H, m), 7.49 (1H, t,  $J = 8.0$  Hz), 7.42 (1H, t,  $J = 8.0$  Hz), 7.31-7.20 (3H, m), 7.11 (1H, d,  $J = 8.0$  Hz), 6.97 (1H, m), 1.93-1.76 (2H, m), 1.69-1.49 (10H, m), 1.18-0.92 (10H, m).  $^{13}\text{C}$  NMR (101 MHz,  $\text{CDCl}_3$ )  $\delta$  152.1, 147.0, 141.4, 141.1, 136.8, 133.6, 133.2, 130.9, 130.3, 129.2, 128.3, 127.9, 127.5, 126.8, 126.6, 126.5, 126.3, 124.4, 123.7, 119.1, 106.5, 35.2, 35.0, 34.4, 34.2, 30.5, 30.4, 30.3, 29.8, 29.7, 29.6, 29.5, 27.5, 27.4, 27.3, 27.2, 27.1, 26.4, 26.3.  $^{31}\text{P}$  NMR (162 MHz,  $\text{CDCl}_3$ )  $\delta$  -8.8. HRMS (ESI)  $[\text{M}+\text{H}]^+$ : calcd for  $\text{C}_{34}\text{H}_{35}\text{OP}+\text{H}^+$  491.2498, found 491.2493.

### 3. General procedure for Suzuki-Miyaura Coupling Reactions Using Biaryl Monophosphine Ligands

To a mixture of boronic acid (0.4mmol), base (0.6mmol),  $\text{Pd}_2(\text{dba})_3$  (0.05-2 mol% Pd), **L** ( $[\text{Pd}] : \text{L} = 1:1$ ) and aryl halide (0.2mmol) was charged degassed solvent (4.0 mL). The resulting solution was stirred at 80 °C under argon for 0.5-6 h, and then cooled to room temperature and concentrated in vacuum, and purified by silica gel column chromatography to provide desired compounds.



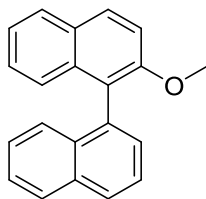

**2-methoxy-1,1'-binaphthalene:** White solid. Yield (99%),  $^1\text{H}$  NMR (400 MHz,  $\text{CDCl}_3$ )  $\delta$  8.05-8.01 (3H, m), 7.95 (1H, d,  $J = 8.0$  Hz), 7.69 (1H, t,  $J = 4.0$  Hz), 7.52-7.49 (3H, m), 7.40-7.23 (5H, m), 3.81 (3H, s).  $^{13}\text{C}$  NMR (101 MHz,  $\text{CDCl}_3$ )  $\delta$  154.6, 134.6, 134.3, 133.7, 133.0, 129.5, 129.0, 128.5, 128.2, 127.8, 126.2, 125.7, 125.6, 125.5, 123.6, 123.2, 113.8, 56.8.

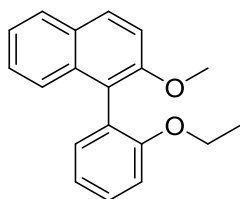

**1-(2-ethoxyphenyl)-2-methoxynaphthalene:** White solid. Yield (99%),  $^1\text{H}$  NMR (400 MHz,  $\text{CDCl}_3$ )  $\delta$  7.93 (1H, d,  $J = 8.0$  Hz), 7.86 (1H, t,  $J = 4.0$  Hz), 7.45-7.40 (3H, m), 7.37-7.35 (2H, m), 7.31-7.27 (1H, m), 7.15-7.10 (2H, m), 4.03-4.00 (2H, m), 3.89 (3H, s), 1.14-1.11 (3H, t,  $J = 8.0$  Hz);  $^{13}\text{C}$  NMR (101 MHz,  $\text{CDCl}_3$ )  $\delta$  157.0, 151.2, 133.6, 132.5, 129.0, 128.9, 128.7, 127.7, 125.9, 125.4, 123.3, 120.5, 113.9, 112.9, 64.0, 56.8, 14.7. HRMS (ESI)  $[\text{M}+\text{H}]^+$ : calcd for  $\text{C}_{19}\text{H}_{18}\text{O}_2+\text{H}^+$  279.1380, found 279.1380.

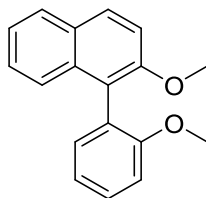

**2-methoxy-1-(2-methoxyphenyl)naphthalene:** White solid. Yield (99%),  $^1\text{H}$  NMR (400 MHz,  $\text{CDCl}_3$ )  $\delta$  7.94 (1H, d,  $J = 8.0$  Hz), 7.86 (1H, t,  $J = 4.0$  Hz), 7.44-7.38 (3H, m), 7.37-7.36 (2H, m), 7.28-7.27 (1H, m), 7.15-7.11 (2H, m), 3.89 (3H, s), 3.74 (3H, s).  $^{13}\text{C}$  NMR (101 MHz,  $\text{CDCl}_3$ )  $\delta$  157.7, 154.2, 133.6, 132.4, 129.1, 129.0, 128.9, 127.8, 126.1, 125.2, 123.4, 120.6, 114.1, 111.3, 56.9, 55.7.

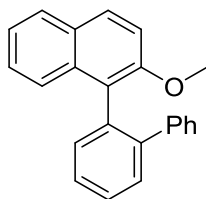

**1-([1,1'-biphenyl]-2-yl)-2-methoxynaphthalene:** White solid. Yield (99%),  $^1\text{H}$  NMR (400 MHz,

$\text{CDCl}_3$ )  $\delta$  7.83 (2H, d,  $J = 8.0$  Hz), 7.61-7.53 (4H, m), 7.41-7.38 (3H, m), 7.17-7.15 (1H, d,  $J = 8.0$  Hz), 7.11-7.08 (5H, m), 3.56 (3H, s).  $^{13}\text{C}$  NMR (101 MHz,  $\text{CDCl}_3$ )  $\delta$  153.5, 143.0, 141.8, 134.8, 133.8, 131.9, 129.8, 128.8, 128.6, 127.9, 127.7, 127.2, 127.1, 126.3, 125.2, 124.3, 123.3, 113.1, 56.0.

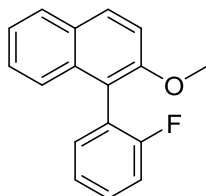

**1-(2-fluorophenyl)-2-methoxynaphthalene:** White solid. Yield (96%),  $^1\text{H}$  NMR (400 MHz,  $\text{CDCl}_3$ )  $\delta$  7.98 (1H, d,  $J = 8.0$  Hz), 7.90-7.87 (1H, m), 7.48 (2H, t,  $J = 8.0$  Hz), 7.44-7.38 (4H, m), 7.34-7.28 (2H, m), 3.91 (3H, s).  $^{13}\text{C}$  NMR (101 MHz,  $\text{CDCl}_3$ )  $\delta$  161.8, 154.4, 133.4, 133.1, 129.9, 129.3, 129.0, 128.0, 126.6, 124.7, 123.9, 123.6, 118.7, 115.8, 113.5, 56.7.

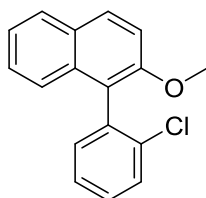

**1-(2-chlorophenyl)-2-methoxynaphthalene:** White solid. Yield (98%),  $^1\text{H}$  NMR (400 MHz,  $\text{CDCl}_3$ )  $\delta$  7.98 (1H, d,  $J = 8.0$  Hz), 7.90-7.87 (1H, m), 7.62-7.60 (1H, m), 7.44-7.38 (7H, m), 3.91 (3H, s).  $^{13}\text{C}$  NMR (101 MHz,  $\text{CDCl}_3$ )  $\delta$  154.0, 135.6, 134.9, 133.1, 132.6, 129.8, 129.5, 138.8, 138.0, 126.6, 124.6, 123.6, 122.4, 113.6, 56.7.

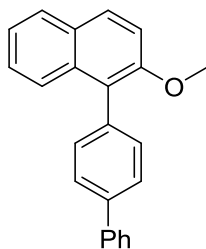

**1-([1,1'-biphenyl]-4-yl)-2-methoxynaphthalene:** White solid. Yield (96%),  $^1\text{H}$  NMR (400 MHz,  $\text{CDCl}_3$ )  $\delta$  7.96 (1H, d,  $J = 8.0$  Hz), 7.90-7.88 (1H, m), 7.80-7.76 (4H, m), 7.65 (1H, t,  $J = 4.0$  Hz), 7.55-7.50 (4H, m), 7.45-7.40 (4H, m), 3.92 (3H, s).  $^{13}\text{C}$  NMR (101 MHz,  $\text{CDCl}_3$ )  $\delta$  153.8, 141.1, 139.8, 135.4, 131.4, 129.2, 129.1, 128.8, 127.9, 127.3, 127.2, 126.9, 126.4, 125.3, 123.6, 113.1, 56.8.

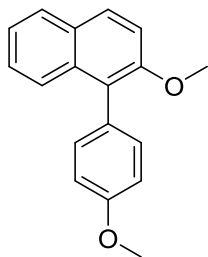

**2-methoxy-1-(4-methoxyphenyl)naphthalene:** White solid. Yield (99%),  $^1\text{H}$  NMR (400 MHz,  $\text{CDCl}_3$ )  $\delta$  7.92 (1H, d,  $J = 8.0$  Hz), 7.87-7.85 (1H, m), 7.60-7.58 (1H, m), 7.42-7.34 (5H, m), 7.10 (2H, d,  $J = 8.0$  Hz), 3.98 (3H, s), 3.88 (3H, s).  $^{13}\text{C}$  NMR (101 MHz,  $\text{CDCl}_3$ )  $\delta$  158.6, 153.9, 133.9, 132.0, 129.0, 128.8, 128.4, 127.8, 126.2, 125.3, 125.0, 123.4, 113.7, 56.8, 55.2.

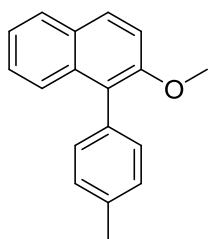

**2-methoxy-1-(p-tolyl)naphthalene:** White solid. Yield (99%),  $^1\text{H}$  NMR (400 MHz,  $\text{CDCl}_3$ )  $\delta$  7.93 (1H, d,  $J = 8.0$  Hz), 7.88-7.86 (1H, m), 7.62-7.57 (1H, m), 7.43-7.36 (5H, m), 7.33-7.31 (2H, m), 3.89 (3H, s), 2.51 (3H, s).  $^{13}\text{C}$  NMR (101 MHz,  $\text{CDCl}_3$ )  $\delta$  153.8, 136.6, 133.7, 133.3, 130.8, 129.0, 128.9, 127.8, 126.2, 125.3, 123.5, 113.8, 56.8, 21.4.

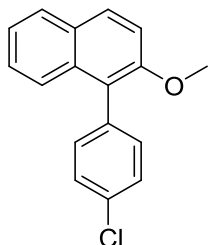

**1-(4-chlorophenyl)-2-methoxynaphthalene:** White solid. Yield (99%),  $^1\text{H}$  NMR (400 MHz,  $\text{CDCl}_3$ )  $\delta$  7.95 (1H, d,  $J = 12.0$  Hz), 7.88-7.86 (1H, m), 7.53-7.51 (3H, m), 7.42-7.34 (5H, m), 3.88 (3H, s).  $^{13}\text{C}$  NMR (101 MHz,  $\text{CDCl}_3$ )  $\delta$  153.7, 134.8, 133.4, 133.0, 132.4, 129.4, 129.0, 128.4, 127.9, 126.5, 124.9, 123.9, 123.6, 113.5, 56.6.

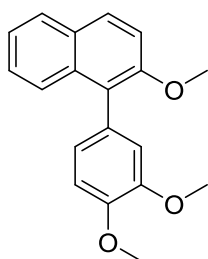

**1-(3,4-dimethoxyphenyl)-2-methoxynaphthalene:** White solid. Yield (97%),  $^1\text{H}$  NMR (400 MHz,  $\text{CDCl}_3$ )  $\delta$  7.92 (1H, d,  $J = 8.0$  Hz), 7.87-7.85 (1H, m), 7.60-7.58 (1H, m), 7.42-7.37 (3H, m), 7.06-7.04 (1H, d,  $J = 8.0$  Hz), 6.98-6.94 (2H, m), 4.00 (3H, s), 3.90 (3H, s), 3.89 (3H, s).  $^{13}\text{C}$  NMR (101 MHz,  $\text{CDCl}_3$ )  $\delta$  153.8, 148.6, 148.0, 133.8, 129.0, 128.9, 128.8, 127.8, 126.3, 125.3, 125.1, 123.5, 123.1, 114.1, 113.8, 110.9, 56.8, 55.9, 55.8.

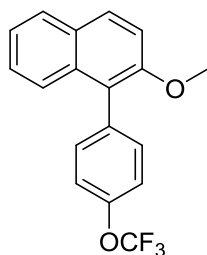

**2-methoxy-1-(4-(trifluoromethoxy)phenyl)naphthalene:** White solid. Yield (97%),  $^1\text{H}$  NMR (400 MHz,  $\text{CDCl}_3$ )  $\delta$  7.95 (1H, d,  $J = 8.0$  Hz), 7.88-7.86 (1H, m), 7.44 (1H, d,  $J = 8.0$  Hz), 7.39-7.36 (7H, m), 3.88 (3H, s).  $^{13}\text{C}$  NMR (101 MHz,  $\text{CDCl}_3$ )  $\delta$  153.7, 148.3, 135.0, 133.4, 132.4, 129.5, 128.9, 127.9, 126.6, 124.8, 123.6, 120.6, 113.5, 56.6.

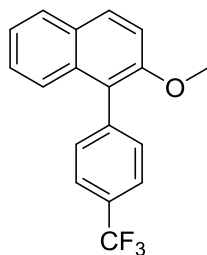

**2-methoxy-1-(4-(trifluoromethyl)phenyl)naphthalene:** White solid. Yield (98%),  $^1\text{H}$  NMR (400 MHz,  $\text{CDCl}_3$ )  $\delta$  7.97 (1H, d,  $J = 8.0$  Hz), 7.90-7.87 (1H, m), 7.81 (2H, d,  $J = 8.0$  Hz), 7.55 (2H, d,  $J = 8.0$  Hz), 7.46-7.39 (4H, m), 3.89 (3H, s).  $^{13}\text{C}$  NMR (101 MHz,  $\text{CDCl}_3$ )  $\delta$  153.6, 140.4, 133.1, 131.4, 129.8, 129.3, 128.9, 128.0, 126.7, 125.1, 124.7, 123.7, 123.6, 113.4, 56.6.

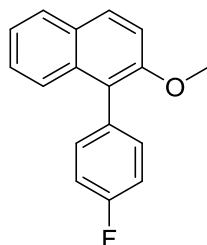

**1-(4-fluorophenyl)-2-methoxynaphthalene:** White solid. Yield (97%),  $^1\text{H}$  NMR (400 MHz,  $\text{CDCl}_3$ )  $\delta$  7.94 (1H, d,  $J = 8.0$  Hz), 7.88-7.86 (1H, m), 7.53-7.51 (1H, m), 7.42-7.36 (5H, m), 7.24 (2H, t,  $J = 8.0$  Hz), 3.88 (3H, s).  $^{13}\text{C}$  NMR (101 MHz,  $\text{CDCl}_3$ )  $\delta$  161.8, 153.8, 133.6, 132.6, 132.1,

129.3, 129.0, 127.9, 126.4, 125.0, 124.1, 123.6, 115.3, 113.6, 56.7.

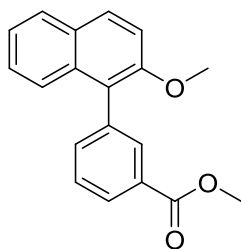

**methyl 3-(2-methoxynaphthalen-1-yl)benzoate:** White solid. Yield (99%),  $^1\text{H}$  NMR (400 MHz,  $\text{CDCl}_3$ )  $\delta$  8.16-8.14 (1H, m), 8.11 (1H, s), 7.95 (1H, d,  $J = 8.0$  Hz), 7.88-7.86 (1H, m), 7.62 (2H, d,  $J = 8.0$  Hz), 7.47-7.37 (4H, m), 3.96 (3H, s), 3.87 (3H, s).  $^{13}\text{C}$  NMR (101 MHz,  $\text{CDCl}_3$ )  $\delta$  167.2, 153.7, 136.8, 135.7, 133.3, 132.2, 130.2, 129.5, 128.9, 128.4, 128.3, 127.9, 126.5, 124.8, 124.0, 123.6, 113.5, 56.6, 52.1. HRMS (ESI)  $[\text{M}+\text{Na}]^+$ : calcd for  $\text{C}_{19}\text{H}_{16}\text{O}_3+\text{Na}^+$  315.0992, found 315.1003.

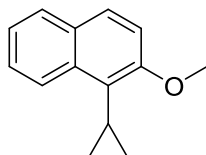

**1-cyclopropyl-2-methoxynaphthalene:** White solid. Yield (91%),  $^1\text{H}$  NMR (400 MHz,  $\text{CDCl}_3$ )  $\delta$  8.51 (1H, d,  $J = 12.0$  Hz), 7.83 (1H, d,  $J = 8.0$  Hz), 7.79 (1H, d,  $J = 8.0$  Hz), 7.54 (1H, t,  $J = 8.0$  Hz), 7.39 (1H, t,  $J = 8.0$  Hz), 7.29 (1H, d,  $J = 8.0$  Hz), 4.01 (3H, s), 2.00-1.96 (1H, m), 1.24-1.19 (2H, m), 0.82-0.78 (2H, m).  $^{13}\text{C}$  NMR (101 MHz,  $\text{CDCl}_3$ )  $\delta$  156.3, 135.0, 129.1, 128.3, 128.2, 125.9, 124.7, 123.3, 114.4, 56.8, 7.9.

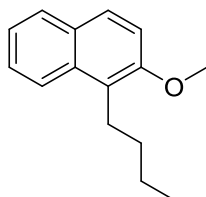

**1-butyl-2-methoxynaphthalene:** White solid. Yield (96%),  $^1\text{H}$  NMR (400 MHz,  $\text{CDCl}_3$ )  $\delta$  8.03 (1H, d,  $J = 8.0$  Hz), 7.84 (1H, d,  $J = 8.0$  Hz), 7.77 (1H, d,  $J = 8.0$  Hz), 7.52 (1H, t,  $J = 8.0$  Hz), 7.38 (1H, t,  $J = 8.0$  Hz), 7.33 (1H, d,  $J = 12.0$  Hz), 3.99 (1H, s), 3.13 (2H, t,  $J = 8.0$  Hz), 1.68-1.63 (2H, m), 1.55-1.52 (2H, m), 1.03 (3H, t,  $J = 8.0$  Hz).  $^{13}\text{C}$  NMR (101 MHz,  $\text{CDCl}_3$ )  $\delta$  154.2, 130.0, 129.3, 128.5, 127.2, 126.0, 124.4, 123.4, 123.1, 113.5, 56.6, 32.4, 24.7, 23.1, 14.1.

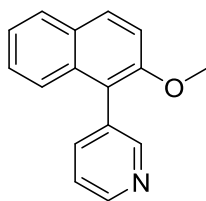

**3-(2-methoxynaphthalen-1-yl)pyridine:** White solid. Yield (82%),  $^1\text{H}$  NMR (400 MHz,  $\text{CDCl}_3$ )  $\delta$  8.70-8.68 (1H, m), 8.66 (1H, s), 7.97 (1H, d,  $J = 12.0$  Hz), 7.87 (1H, t,  $J = 4.0$  Hz), 7.76-7.73 (1H, m), 7.50-7.45 (2H, m), 7.42-7.38 (3H, m), 3.87 (3H, s).  $^{13}\text{C}$  NMR (101 MHz,  $\text{CDCl}_3$ )  $\delta$  154.1, 151.8, 148.2, 138.6, 133.3, 130.0, 128.9, 128.1, 126.8, 124.5, 123.7, 123.1, 133.3, 56.5.

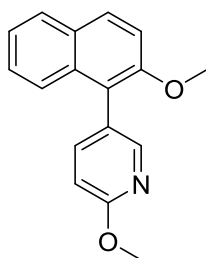

**2-methoxy-5-(2-methoxynaphthalen-1-yl)pyridine:** White solid. Yield (91%),  $^1\text{H}$  NMR (400 MHz,  $\text{CDCl}_3$ )  $\delta$  8.22 (1H, d,  $J = 4.0$  Hz), 7.94 (1H, d,  $J = 8.0$  Hz), 7.87-7.85 (1H, m), 7.65-7.63 (1H, m), 7.59-7.57 (1H, m), 7.41-7.36 (3H, m), 6.94 (1H, d,  $J = 8.0$  Hz), 4.06 (3H, s), 3.88 (3H, s).  $^{13}\text{C}$  NMR (101 MHz,  $\text{CDCl}_3$ )  $\delta$  163.2, 154.2, 148.4, 141.5, 133.7, 129.5, 129.0, 128.9, 128.0, 126.6, 124.7, 123.6, 121.3, 113.4, 110.3, 56.6, 53.5. HRMS (ESI)  $[\text{M}+\text{H}]^+$ : calcd for  $\text{C}_{17}\text{H}_{15}\text{O}_2\text{N}+\text{H}^+$  266.1176, found 266.1188.

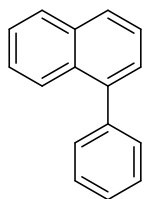

**1-phenylnaphthalene:** White solid. Yield (99%),  $^1\text{H}$  NMR (400 MHz,  $\text{CDCl}_3$ )  $\delta$  8.00-7.97 (2H, m), 7.94 (1H, d,  $J = 8.0$  Hz), 7.61-7.54 (6H, m), 7.51-7.49 (3H, m).  $^{13}\text{C}$  NMR (101 MHz,  $\text{CDCl}_3$ )  $\delta$  140.8, 140.3, 133.8, 131.6, 130.1, 128.3, 127.6, 127.2, 126.9, 126.0, 125.8, 125.4.

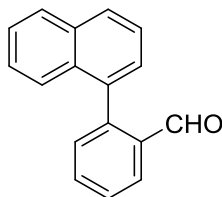

**2-(naphthalen-1-yl)benzaldehyde:** White solid. Yield (99%),  $^1\text{H}$  NMR (400 MHz,  $\text{CDCl}_3$ )  $\delta$  9.68 (1H, s), 8.17 (1H, d,  $J = 8.0$  Hz), 7.99 (1H, s,  $J = 12.0$  Hz), 7.74-7.71 (1H, m), 7.62-7.57 (2H, m),

7.55-7.50 (2H, m), 7.50-7.44 (3H, m).  $^{13}\text{C}$  NMR (101 MHz,  $\text{CDCl}_3$ )  $\delta$  192.1, 144.3, 135.4, 134.8, 133.7, 133.4, 132.7, 131.7, 128.6, 128.4, 128.2, 127.1, 126.8, 126.2, 125.8, 125.0.

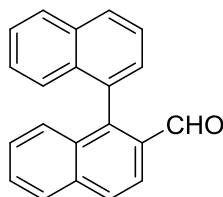

**[1,1'-binaphthalene]-2-carbaldehyde:** White solid. Yield (99%),  $^1\text{H}$  NMR (400 MHz,  $\text{CDCl}_3$ )  $\delta$  9.72 (1H, s), 8.20 (1H, d,  $J = 8.0$  Hz), 8.07 (2H, d,  $J = 4.0$  Hz), 8.01 (2H, t,  $J = 4.0$  Hz), 7.68-7.58 (2H, m), 7.55-7.48 (2H, m), 7.42-7.32 (3H, m), 7.26 (1H, d,  $J = 12.0$  Hz).  $^{13}\text{C}$  NMR (101 MHz,  $\text{CDCl}_3$ )  $\delta$  192.5, 144.9, 136.1, 133.5, 133.3, 133.0, 132.9, 132.1, 129.2, 129.0, 128.9, 128.7, 128.3, 128.2, 127.7, 127.0, 126.8, 126.3, 126.2, 125.0, 122.1.

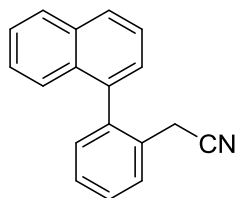

**2-(2-(naphthalen-1-yl)phenyl)acetonitrile:** White solid. Yield (87%),  $^1\text{H}$  NMR (400 MHz,  $\text{CDCl}_3$ )  $\delta$  7.98-7.95 (2H, m), 7.71 (1H, d,  $J = 8.0$  Hz), 7.61-7.44 (5H, m), 7.41-7.37 (3H, m), 3.42 (2H, s).  $^{13}\text{C}$  NMR (101 MHz,  $\text{CDCl}_3$ )  $\delta$  139.8, 137.1, 131.0, 128.6, 128.5, 128.4, 128.2, 127.0, 126.7, 126.2, 125.5, 125.2, 118.0, 21.8. HRMS (ESI)  $[\text{M}+\text{Na}]^+$ : calcd for  $\text{C}_{18}\text{H}_{13}\text{N}+\text{Na}^+$  266.0940, found 266.0957.

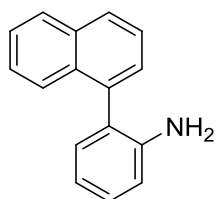

**2-(naphthalen-1-yl)aniline:** White solid. Yield (92%),  $^1\text{H}$  NMR (400 MHz,  $\text{CDCl}_3$ )  $\delta$  7.97-7.92 (2H, m), 7.72 (1H, d,  $J = 8.0$  Hz), 7.62-7.47 (4H, m), 7.33-7.28 (1H, m), 7.22 (1H, d,  $J = 8.0$  Hz), 6.93 (1H, t,  $J = 8.0$  Hz), 6.89 (1H, d,  $J = 12.0$  Hz), 3.44 (2H, s).  $^{13}\text{C}$  NMR (101 MHz,  $\text{CDCl}_3$ )  $\delta$  144.3, 133.8, 131.2, 128.8, 128.3, 128.0, 127.6, 126.3, 126.0, 125.8, 118.3, 115.3.

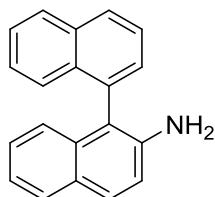

**[1,1'-binaphthalen]-2-amine:** White solid. Yield (94%),  $^1\text{H}$  NMR (400 MHz,  $\text{CDCl}_3$ )  $\delta$  7.98-7.94 (3H, m), 7.62 (1H, t,  $J = 8.0$  Hz), 7.54-7.47 (4H, m), 7.44 (1H, d,  $J = 8.0$  Hz), 7.36-7.28 (3H, m), 6.95 (1H, d,  $J = 8.0$  Hz), 4.29 (2H, s).  $^{13}\text{C}$  NMR (101 MHz,  $\text{CDCl}_3$ )  $\delta$  141.9, 138.9, 133.6, 133.5, 133.3, 129.3, 128.3, 128.1, 127.5, 127.2, 126.8, 125.9, 125.8, 125.7, 125.4, 124.8, 123.5, 120.9, 109.3.

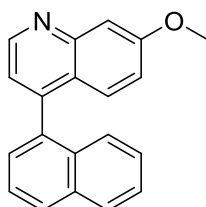

**7-methoxy-4-(naphthalen-1-yl)quinoline:** White solid. Yield (94%),  $^1\text{H}$  NMR (400 MHz,  $\text{CDCl}_3$ )  $\delta$  8.96 (1H, d,  $J = 4.0$  Hz), 7.99 (2H, d,  $J = 8.0$  Hz), 7.62 (1H, d,  $J = 8.0$  Hz), 7.57-7.47 (3H, m), 7.40-7.29 (4H, m), 7.06-7.03 (1H, m), 4.00 (3H, s).  $^{13}\text{C}$  NMR (101 MHz,  $\text{CDCl}_3$ )  $\delta$  160.6, 150.2, 150.1, 147.2, 135.7, 133.4, 131.8, 128.7, 128.3, 127.5, 127.3, 126.4, 126.1, 125.9, 125.2, 123.2, 120.6, 119.7, 107.4, 55.5.

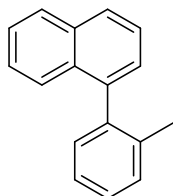

**1-(o-tolyl)naphthalene:** White solid. Yield (99%),  $^1\text{H}$  NMR (400 MHz,  $\text{CDCl}_3$ )  $\delta$  7.97-7.91 (2H, m), 7.60-7.51 (3H, m), 7.45 (1H, d,  $J = 8.0$  Hz), 7.41-7.37 (3H, m), 7.35-7.29 (2H, m), 2.08 (3H, s).  $^{13}\text{C}$  NMR (101 MHz,  $\text{CDCl}_3$ )  $\delta$  140.2, 139.8, 136.8, 133.5, 132.0, 130.4, 129.8, 128.2, 127.6, 127.4, 126.6, 126.1, 126.0, 125.7, 125.6, 125.4, 20.1.

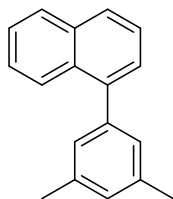

**1-(3,5-dimethylphenyl)naphthalene:** White solid. Yield (99%),  $^1\text{H}$  NMR (400 MHz,  $\text{CDCl}_3$ )  $\delta$  8.01 (1H, d,  $J = 8.0$  Hz), 7.97 (1H, d,  $J = 12.0$  Hz), 7.91 (1H, d,  $J = 8.0$  Hz), 7.59-7.51 (2H, m), 7.50-7.46 (2H, m), 7.19 (2H, s), 7.14 (1H, s), 2.47 (6H, s).  $^{13}\text{C}$  NMR (101 MHz,  $\text{CDCl}_3$ )  $\delta$  140.7, 140.5, 137.7, 133.8, 131.7, 128.8, 128.2, 127.9, 127.4, 126.7, 126.2, 125.9, 125.7, 125.3, 21.4.



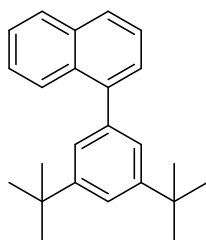

**1-(3,5-di-*tert*-butylphenyl)naphthalene:** White solid. Yield (99%),  $^1\text{H}$  NMR (400 MHz,  $\text{CDCl}_3$ )  $\delta$  8.05 (1H, d,  $J = 8.0$  Hz), 7.99 (1H, d,  $J = 8.0$  Hz), 7.94 (1H, d,  $J = 8.0$  Hz), 7.61-7.51 (5H, m), 7.44 (2H, s), 1.47 (18H, s).  $^{13}\text{C}$  NMR (101 MHz,  $\text{CDCl}_3$ )  $\delta$  150.5, 141.4, 139.8, 133.9, 131.8, 128.3, 127.4, 126.9, 126.3, 125.9, 125.7, 125.4, 124.5, 121.1, 35.0, 31.6.

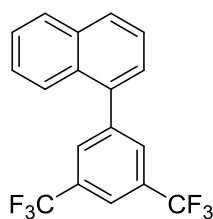

**1-(3,5-bis(trifluoromethyl)phenyl)naphthalene:** White solid. Yield (99%),  $^1\text{H}$  NMR (400 MHz,  $\text{CDCl}_3$ )  $\delta$  8.01-7.98 (5H, m), 7.75 (1H, d,  $J = 8.0$  Hz), 7.62-7.54 (3H, m), 7.48 (1H, d,  $J = 8.0$  Hz).  $^{13}\text{C}$  NMR (101 MHz,  $\text{CDCl}_3$ )  $\delta$  142.8, 136.9, 133.8, 131.9, 131.5, 130.9, 130.1, 129.1, 128.6, 127.4, 127.0, 126.3, 125.3, 124.7, 122.0, 121.3, 121.2, 121.1.

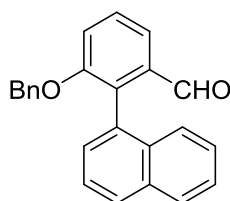

**3-(benzyloxy)-2-(naphthalen-1-yl)benzaldehyde:** White solid. Yield (99%),  $^1\text{H}$  NMR (400 MHz,  $\text{CDCl}_3$ )  $\delta$  9.60 (1H, s), 8.00 (1H, d,  $J = 8.0$  Hz), 7.61 (1H, t,  $J = 8.0$  Hz), 7.56-7.43 (6H, m), 7.33 (1H, d,  $J = 8.0$  Hz), 7.20-7.19 (3H, m), 6.96-6.94 (2H, m), 5.03 (2H, s).  $^{13}\text{C}$  NMR (101 MHz,  $\text{CDCl}_3$ )  $\delta$  192.1, 156.7, 136.5, 136.3, 134.0, 133.4, 133.0, 131.4, 129.1, 128.8, 128.5, 128.4, 128.3, 127.6, 126.4, 126.1, 126.0, 125.1, 119.4, 118.2, 70.5. HRMS (ESI)  $[\text{M}+\text{Na}]^+$ : calcd for  $\text{C}_{24}\text{H}_{18}\text{O}_2+\text{Na}^+$  361.1199, found 361.1208.

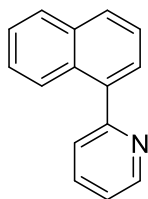

**2-(naphthalen-1-yl)pyridine:** White solid. Yield (93%),  $^1\text{H}$  NMR (400 MHz,  $\text{CDCl}_3$ )  $\delta$  8.83 (1H,

d,  $J = 4.0$  Hz), 8.12 (1H, d,  $J = 8.0$  Hz), 7.95 (2H, d,  $J = 8.0$  Hz), 7.86 (1H, t,  $J = 8.0$  Hz), 7.64-7.58 (3H, m), 7.53-7.50 (2H, m), 7.37 (1H, t,  $J = 8.0$  Hz).  $^{13}\text{C}$  NMR (101 MHz,  $\text{CDCl}_3$ )  $\delta$  159.2, 149.5, 138.4, 136.4, 133.9, 131.1, 128.9, 128.3, 127.4, 126.4, 125.8, 125.5, 125.3, 125.1, 122.0.

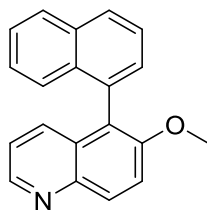

**6-methoxy-5-(naphthalen-1-yl)quinoline:** White solid. Yield (95%),  $^1\text{H}$  NMR (400 MHz,  $\text{CDCl}_3$ )  $\delta$  8.81-8.79 (1H, m), 8.31 (1H, d,  $J = 8.0$  Hz), 7.99 (2H, t,  $J = 8.0$  Hz), 7.71 (1H, d,  $J = 12.0$  Hz), 7.66-7.63 (1H, m), 7.55-7.48 (2H, m), 7.45-7.43 (1H, m), 7.35-7.31 (2H, m), 7.18-7.15 (1H, m), 3.82 (3H, s).  $^{13}\text{C}$  NMR (101 MHz,  $\text{CDCl}_3$ )  $\delta$  154.6, 148.1, 143.7, 133.8, 133.7, 133.1, 132.7, 130.6, 129.3, 129.2, 128.6, 128.3, 128.1, 126.1, 125.8, 125.5, 121.3, 116.8, 56.7. HRMS (ESI)  $[\text{M}+\text{H}]^+$ : calcd for  $\text{C}_{20}\text{H}_{15}\text{NO}+\text{H}^+$  286.1226, found 286.1237.

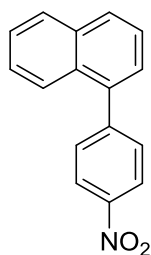

**1-(4-nitrophenyl)naphthalene:** White solid. Yield (95%),  $^1\text{H}$  NMR (400 MHz,  $\text{CDCl}_3$ )  $\delta$  8.40 (1H, d,  $J = 12.0$  Hz), 7.99 (1H, d,  $J = 4.0$  Hz), 7.97 (1H, d,  $J = 4.0$  Hz), 7.83 (1H, d,  $J = 8.0$  Hz), 7.71 (2H, d,  $J = 8.0$  Hz), 7.61-7.55 (2H, m), 7.51 (1H, t,  $J = 8.0$  Hz), 7.47 (1H, d,  $J = 8.0$  Hz).  $^{13}\text{C}$  NMR (101 MHz,  $\text{CDCl}_3$ )  $\delta$  147.6, 147.1, 137.7, 133.8, 130.9, 128.9, 128.6, 127.1, 126.7, 126.2, 125.3, 125.1, 123.6.

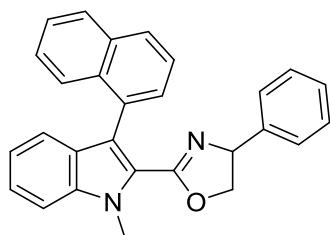

**2-(1-methyl-3-(naphthalen-1-yl)-1H-indol-2-yl)-4-phenyl-4,5-dihydrooxazole:** White solid. Yield (94%),  $^1\text{H}$  NMR (400 MHz,  $\text{CDCl}_3$ )  $\delta$  7.98-7.92 (2H, m), 7.88-7.80 (1H, m), 7.65-7.59 (2H,

m), 7.52 (2H, t,  $J = 8.0$  Hz), 7.48-7.31 (6H, m), 7.27 (1H, d,  $J = 8.0$  Hz), 7.17-7.13 (2H, m), 5.34-5.28 (1H, m), 4.37-4.32 (0.5H, m), 4.27 (3H, d,  $J = 4.0$  Hz), 4.19-4.15 (0.5H, m), 3.88-3.84 (0.5H, m), 3.61-3.57 (0.5H, m).  $^{13}\text{C}$  NMR (101 MHz,  $\text{CDCl}_3$ )  $\delta$  159.7, 142.2, 142.1, 138.6, 138.5, 133.7, 133.6, 133.1, 133.0, 132.7, 132.6, 128.7, 128.6, 128.3, 128.1, 127.8, 127.6, 127.5, 127.4, 126.8, 126.5, 126.3, 126.2, 127.7, 127.5, 127.3, 127.2, 124.6, 124.4, 121.2, 120.4, 120.0, 110.0, 73.8, 70.1, 70.0, 32.2. HRMS (ESI)  $[\text{M}+\text{H}]^+$ : calcd for  $\text{C}_{28}\text{H}_{22}\text{N}_2\text{O}+\text{H}^+$  403.1805, found 403.1811.

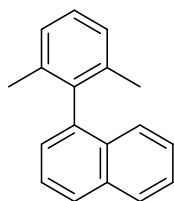

**1-(2,6-dimethylphenyl)naphthalene:** White solid. Yield (80%),  $^1\text{H}$  NMR (400 MHz,  $\text{CDCl}_3$ )  $\delta$  7.96 (1H, d,  $J = 8.0$  Hz), 7.92 (1H, d,  $J = 8.0$  Hz), 7.59 (1H, t,  $J = 8.0$  Hz), 7.53-7.51 (1H, m), 7.39-7.38 (2H, m), 7.32-7.29 (2H, m), 7.23-7.21 (2H, m), 1.95 (6H, s).  $^{13}\text{C}$  NMR (101 MHz,  $\text{CDCl}_3$ )  $\delta$  139.6, 138.7, 137.0, 133.7, 131.7, 128.3, 127.9, 127.3, 127.2, 126.4, 126.0, 125.8, 125.7, 125.4, 20.4.

[1] T. Taniguchi, T. Fukuba, S. Nakatsuka, S. Hayase, M. Kawatsura, H. Uno and T. Itoh, *J. Org. Chem.* 1994, **59**, 1967-1969.

[2] W. M. Ren, Y. Liu, G. P. Wu, J. Liu and X. B. Lu, *J. Polym. Sci. Polym. Chem.* 2011, **49**, 4894-4901.

[3] Q. S. Guo, D. M. Du and J. Xu, *Angew. Chem. Int. Ed.* 2008, **47**, 759-762.

## NMR Spectra for L1-L6 and Some of New Compounds

### (1-(naphtho[2,3-b]furan-9-yl)naphthalen-2-yl)diphenylphosphine (L1):

$^1\text{H-NMR}$  (400 MHz,  $\text{CDCl}_3$ )

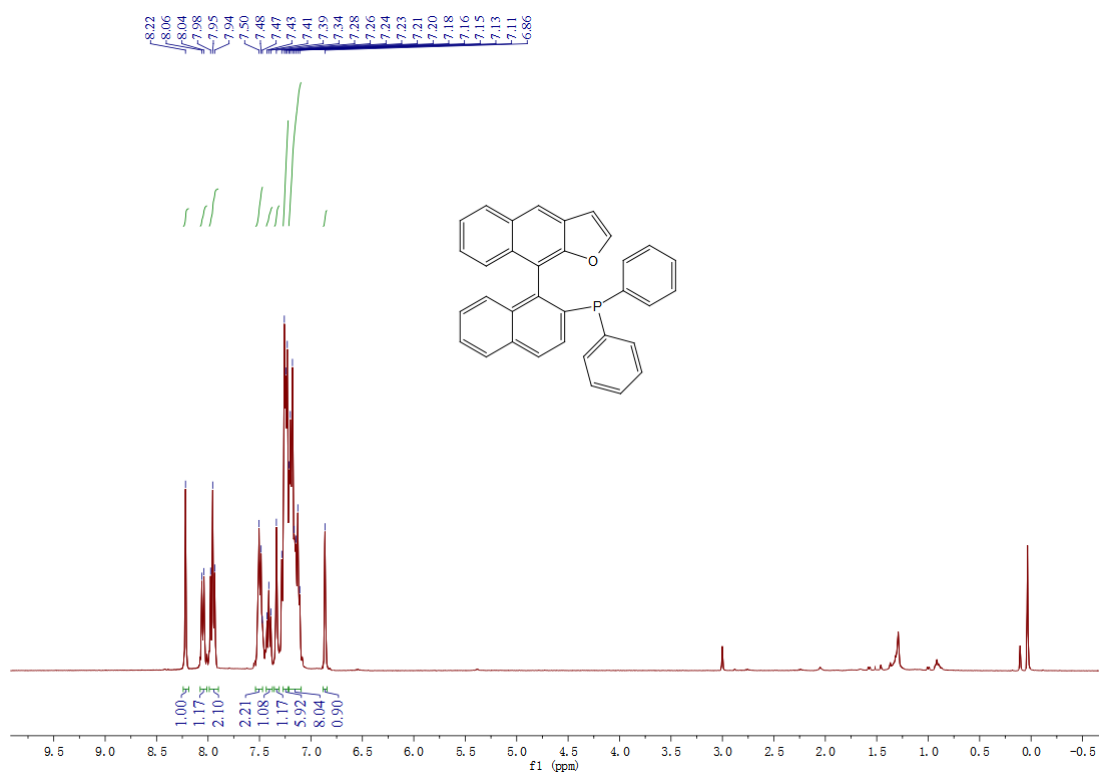

$^{13}\text{C-NMR}$  (101 MHz,  $\text{CDCl}_3$ )

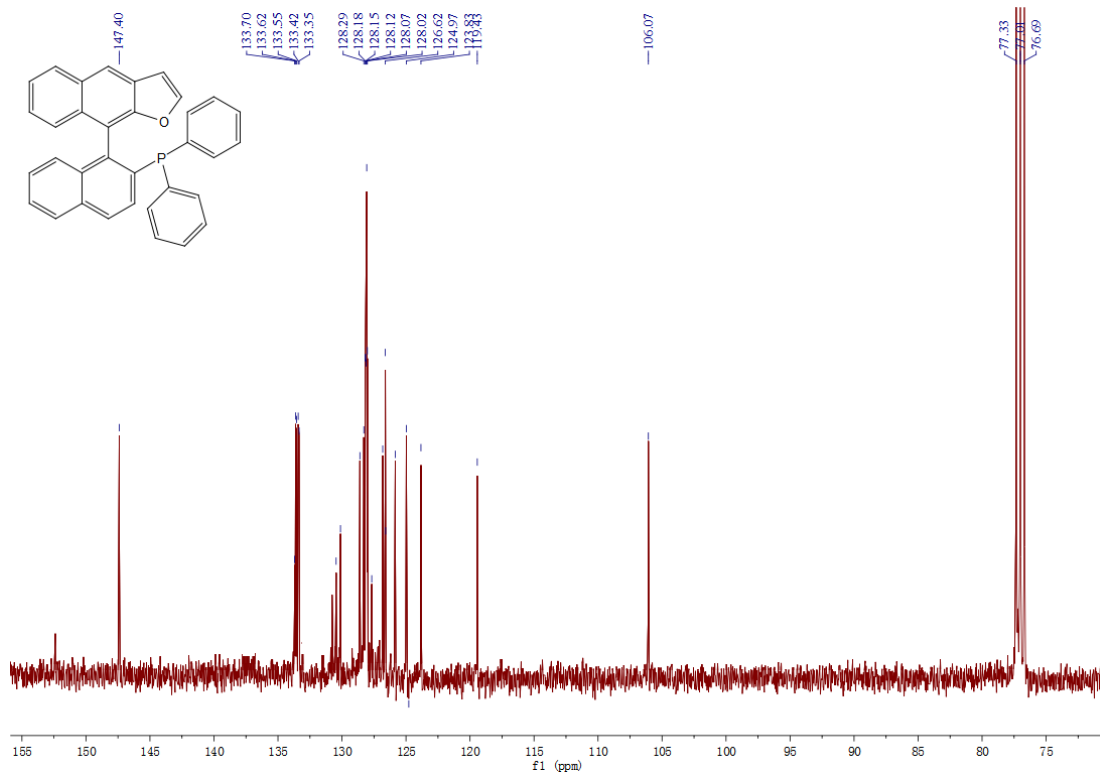

$^{31}\text{P}$  NMR (162 MHz,  $\text{CDCl}_3$ )

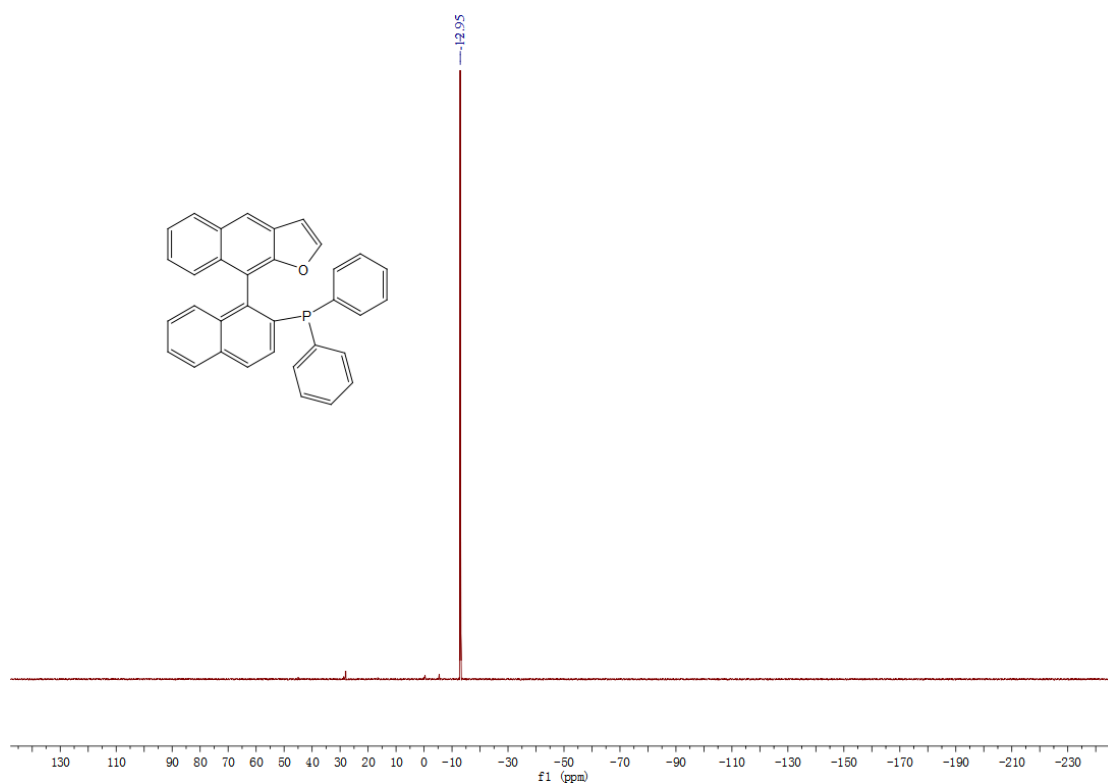

**(1-(naphtho[2,3-b]furan-9-yl)naphthalen-2-yl)di-*p*-tolylphosphine (L2):**

$^1\text{H}$ -NMR (400 MHz,  $\text{CDCl}_3$ )

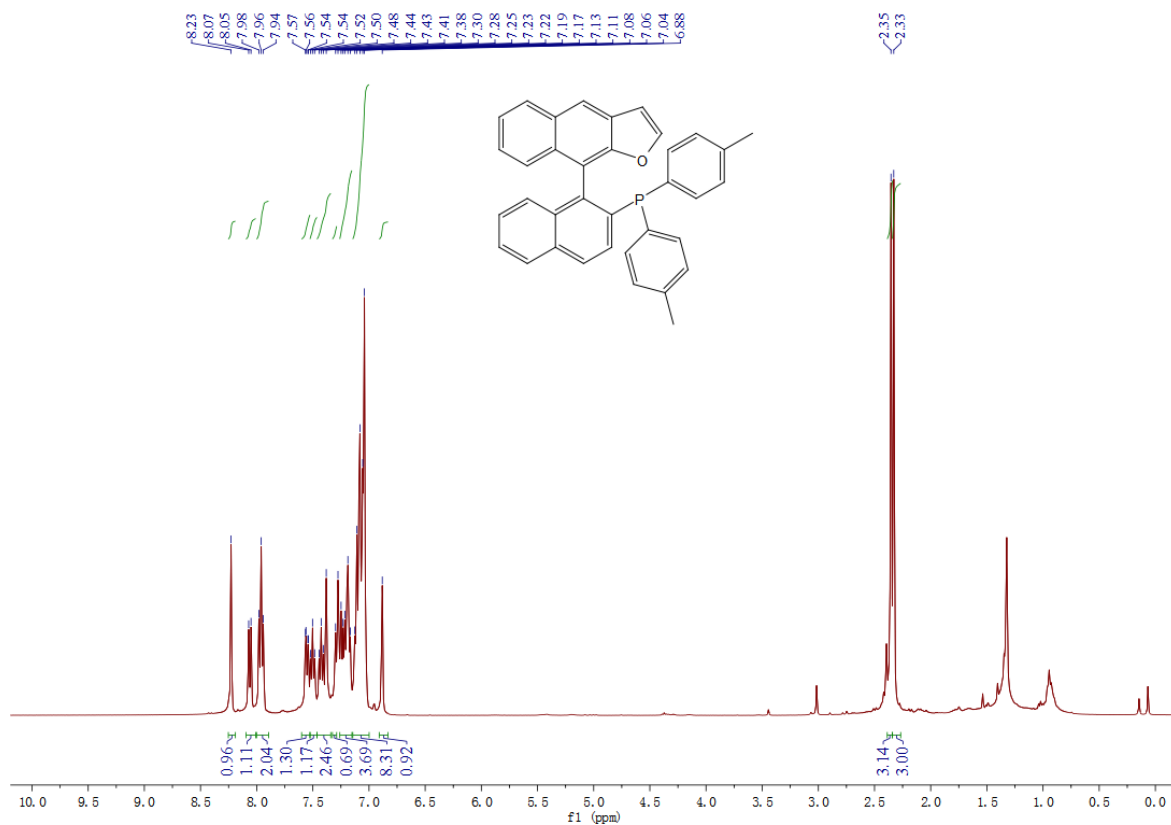

<sup>13</sup>C-NMR (101 MHz, CDCl<sub>3</sub>)

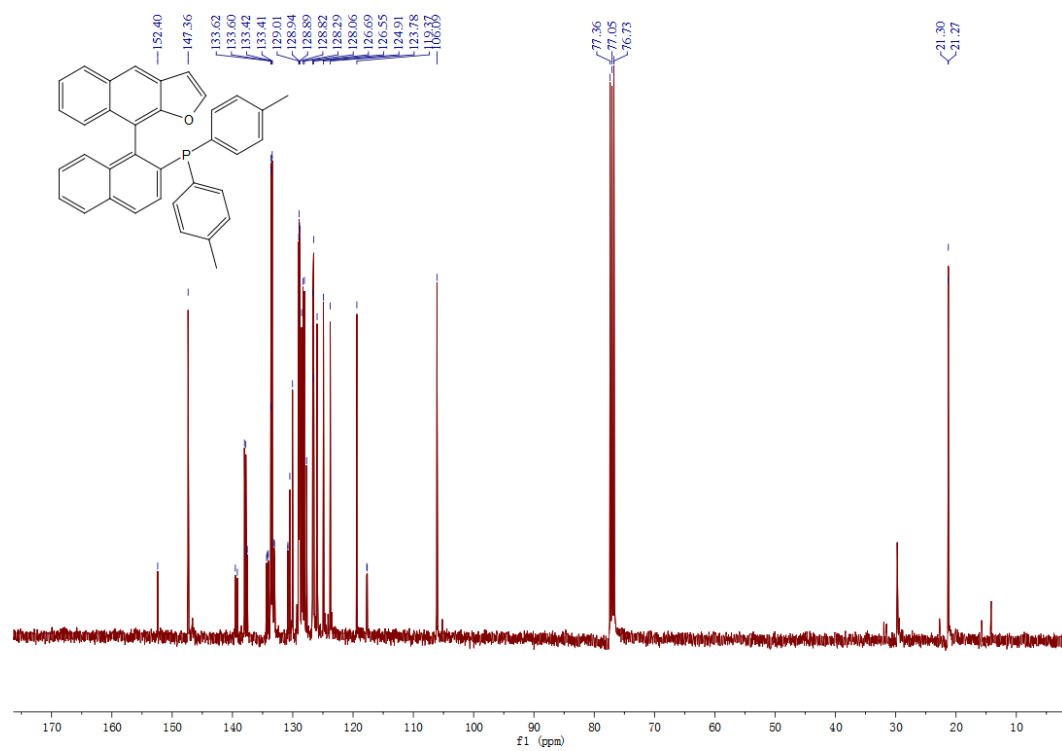

<sup>31</sup>P NMR (162 MHz, CDCl<sub>3</sub>)

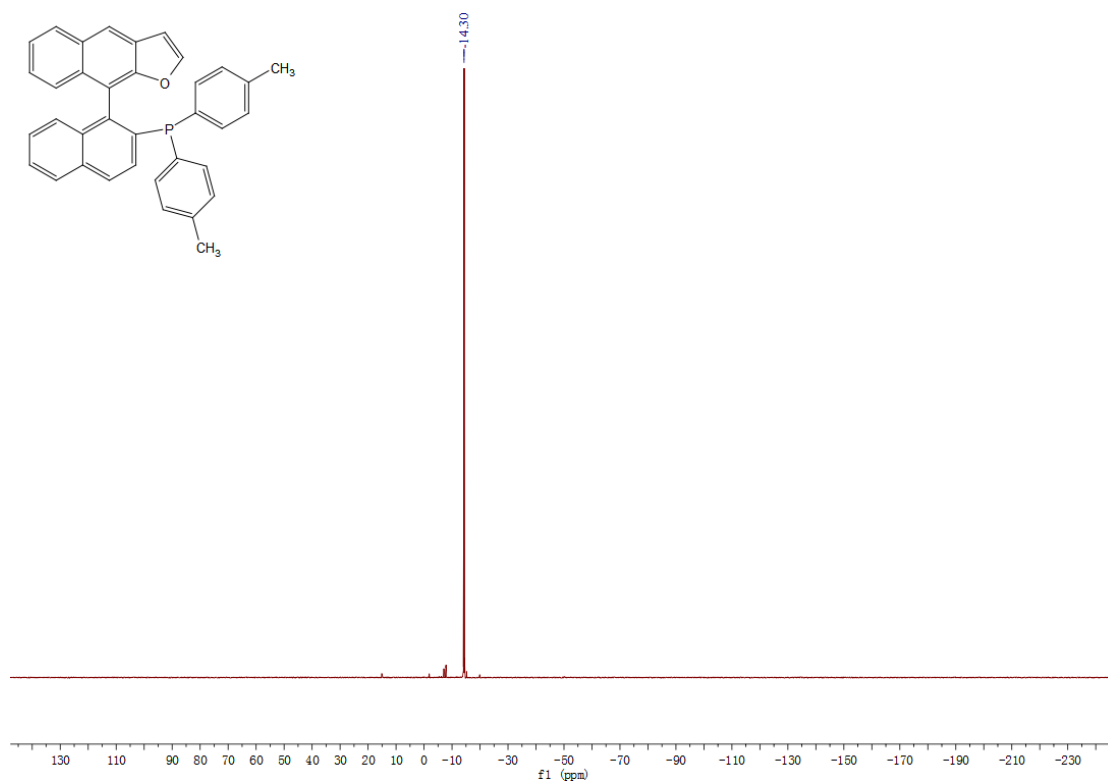

**bis(3,5-dimethylphenyl)(1-(naphtho[2,3-b]furan-9-yl)naphthalen-2-yl)phosphine (L3):**

$^1\text{H-NMR}$  (400 MHz,  $\text{CDCl}_3$ )

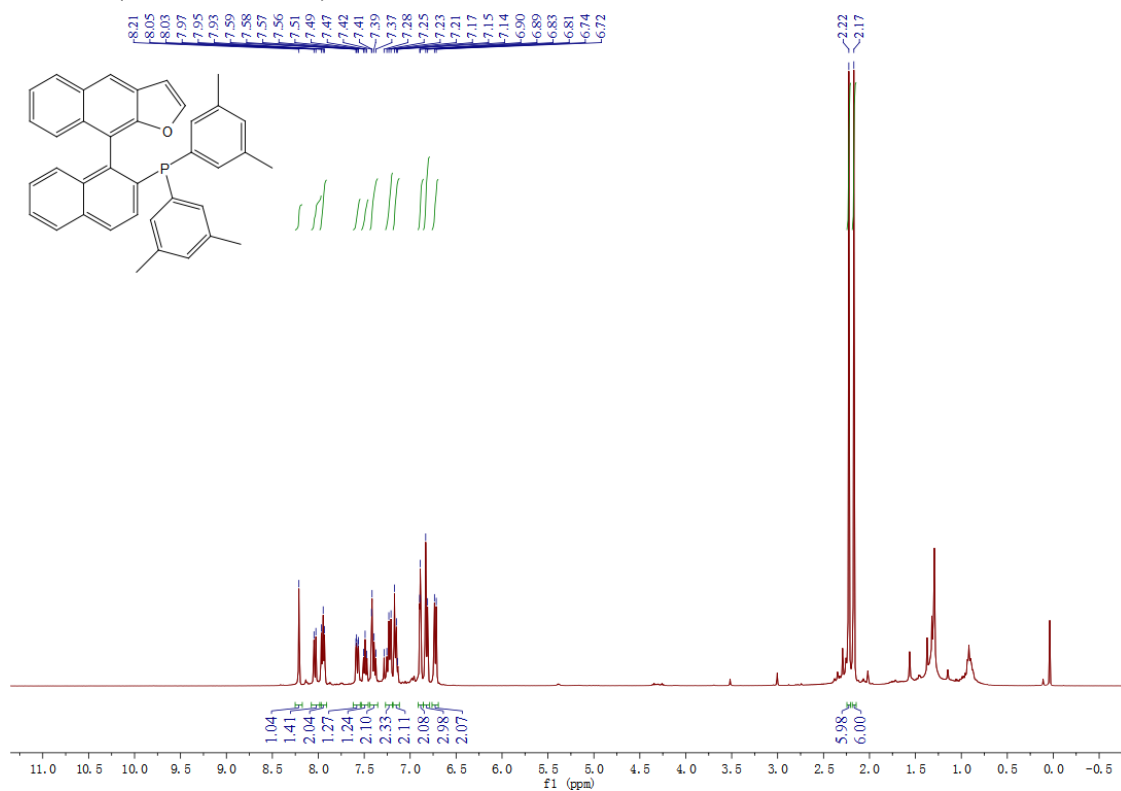

$^{13}\text{C-NMR}$  (101 MHz,  $\text{CDCl}_3$ )

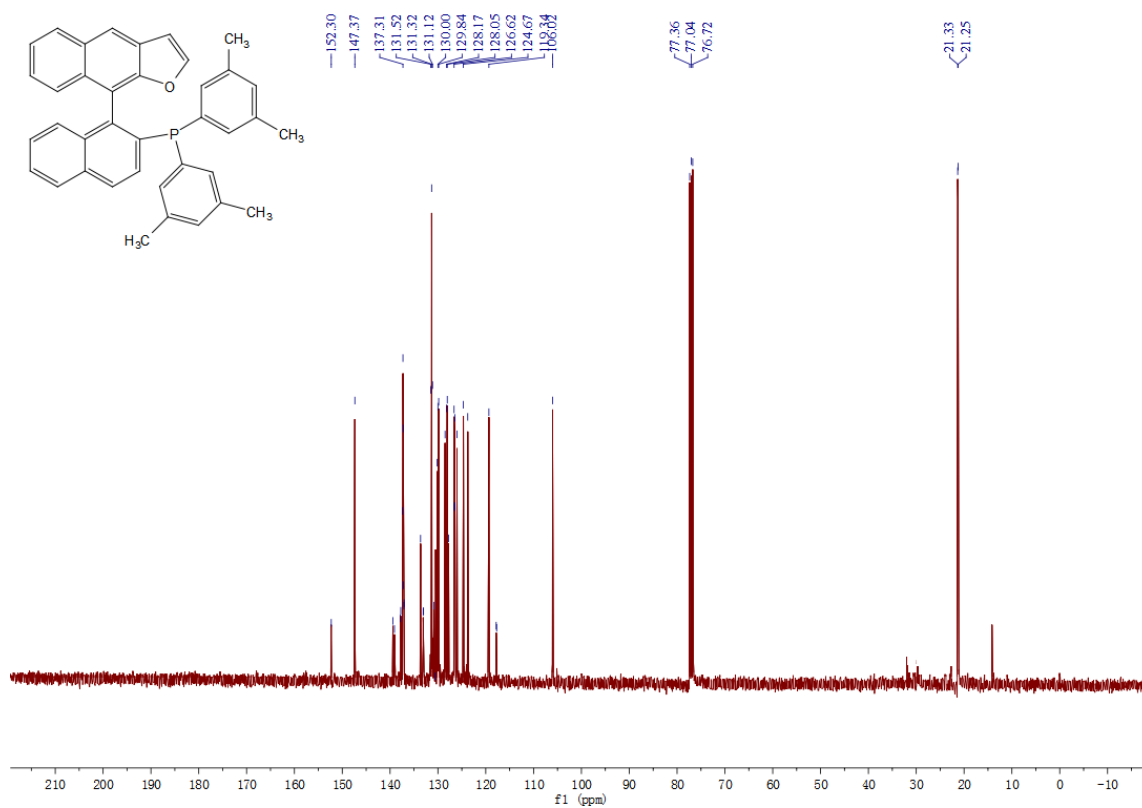

$^{31}\text{P}$  NMR (162 MHz,  $\text{CDCl}_3$ )

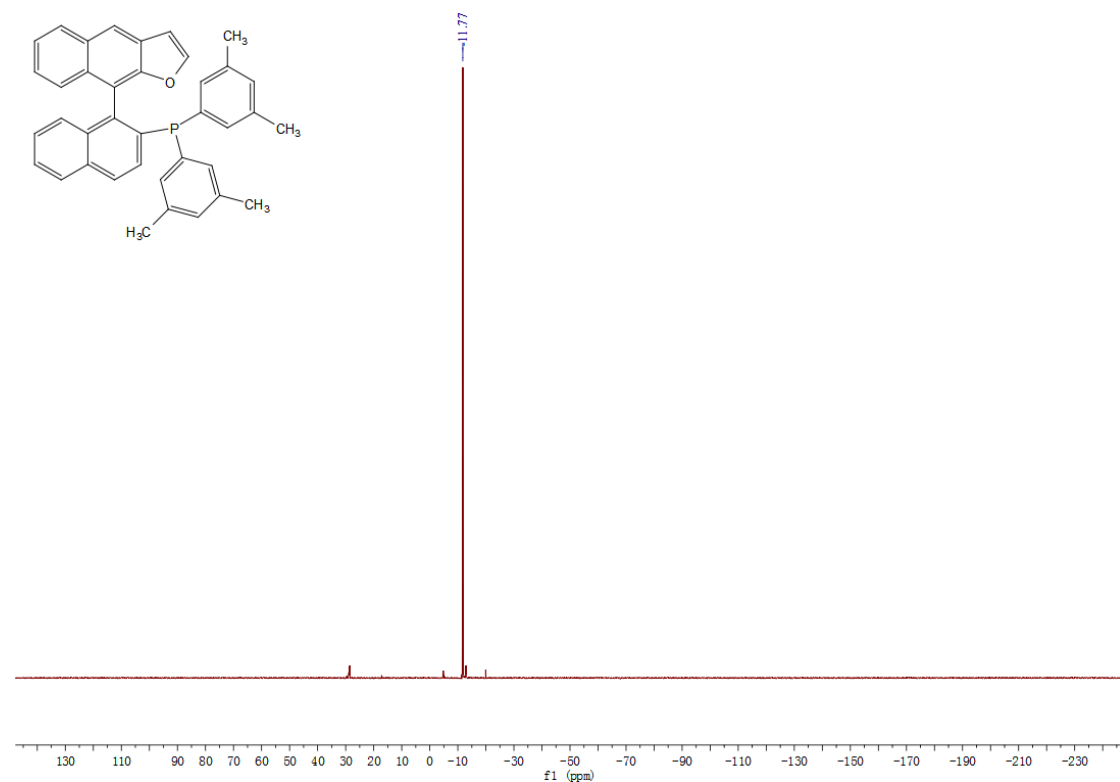

**bis(3,5-di-*tert*-butylphenyl)(1-(naphtho[2,3-b]furan-9-yl)naphthalen-2-yl)phosphine (L4):**

$^1\text{H}$ -NMR (400 MHz,  $\text{CDCl}_3$ )

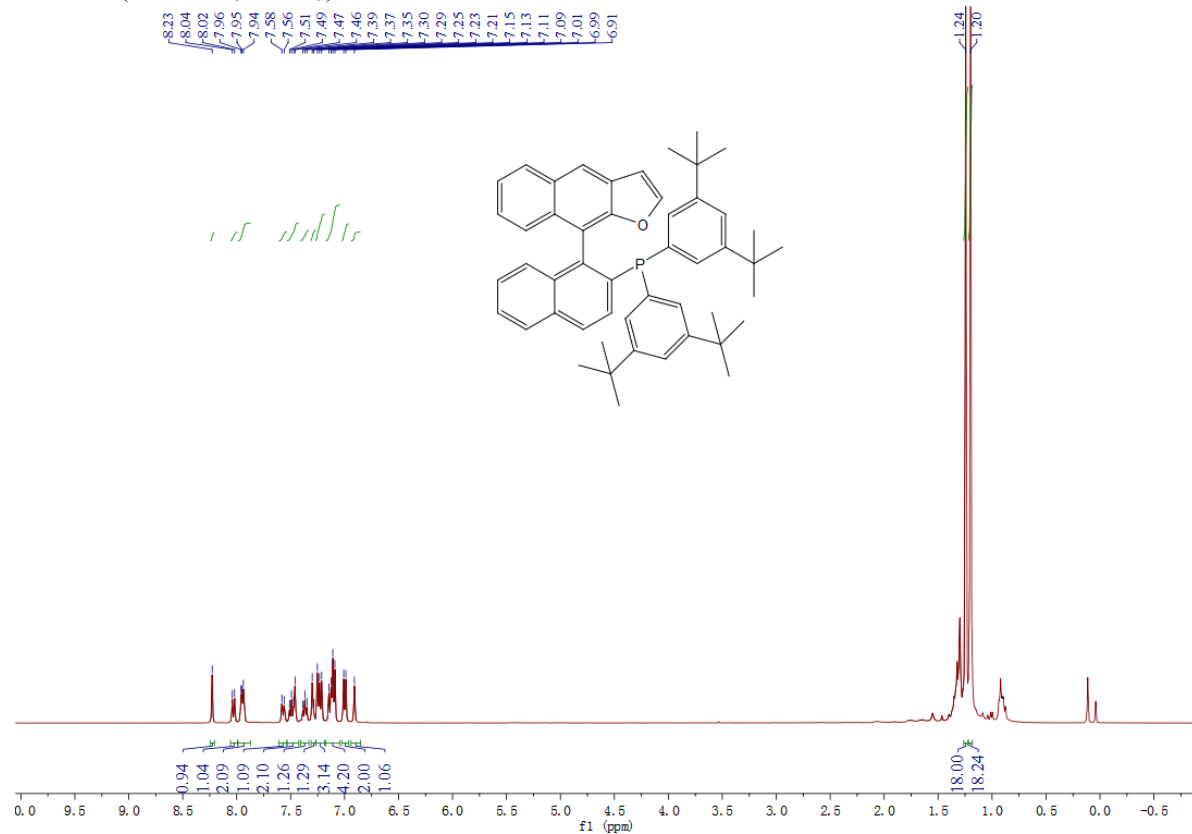



$^{13}\text{C}$ -NMR (101 MHz,  $\text{CDCl}_3$ )

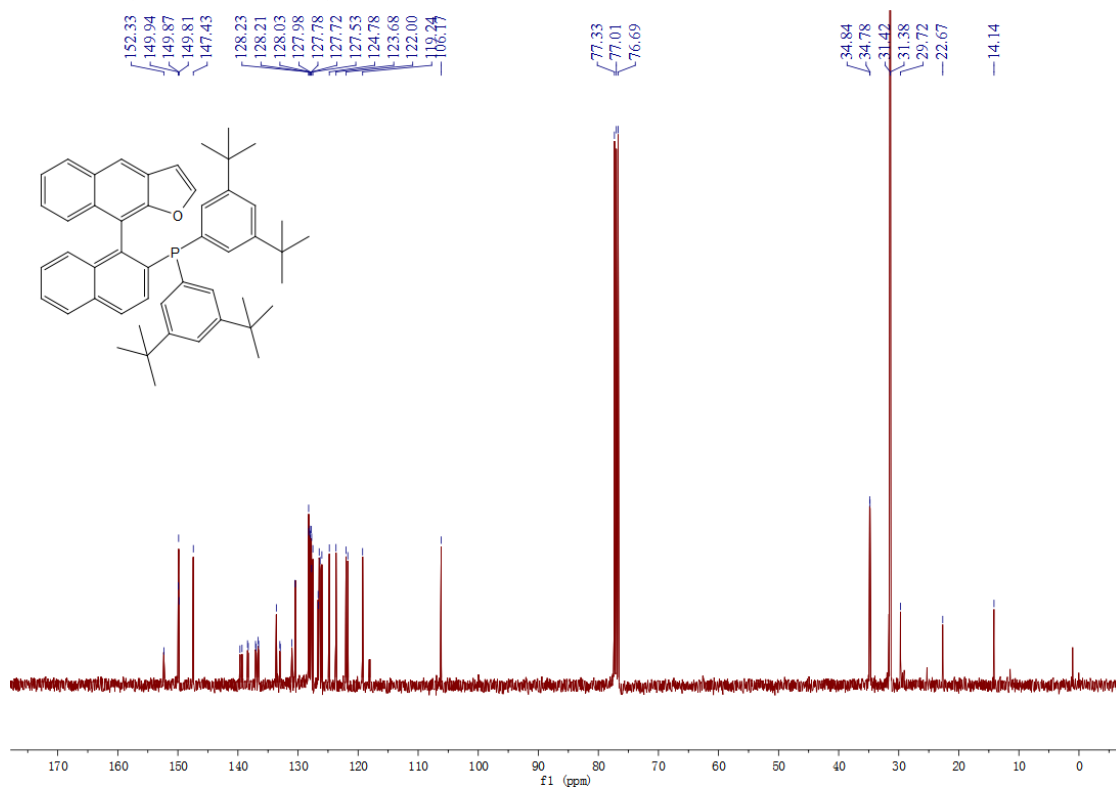

$^{31}\text{P}$  NMR (162 MHz,  $\text{CDCl}_3$ )

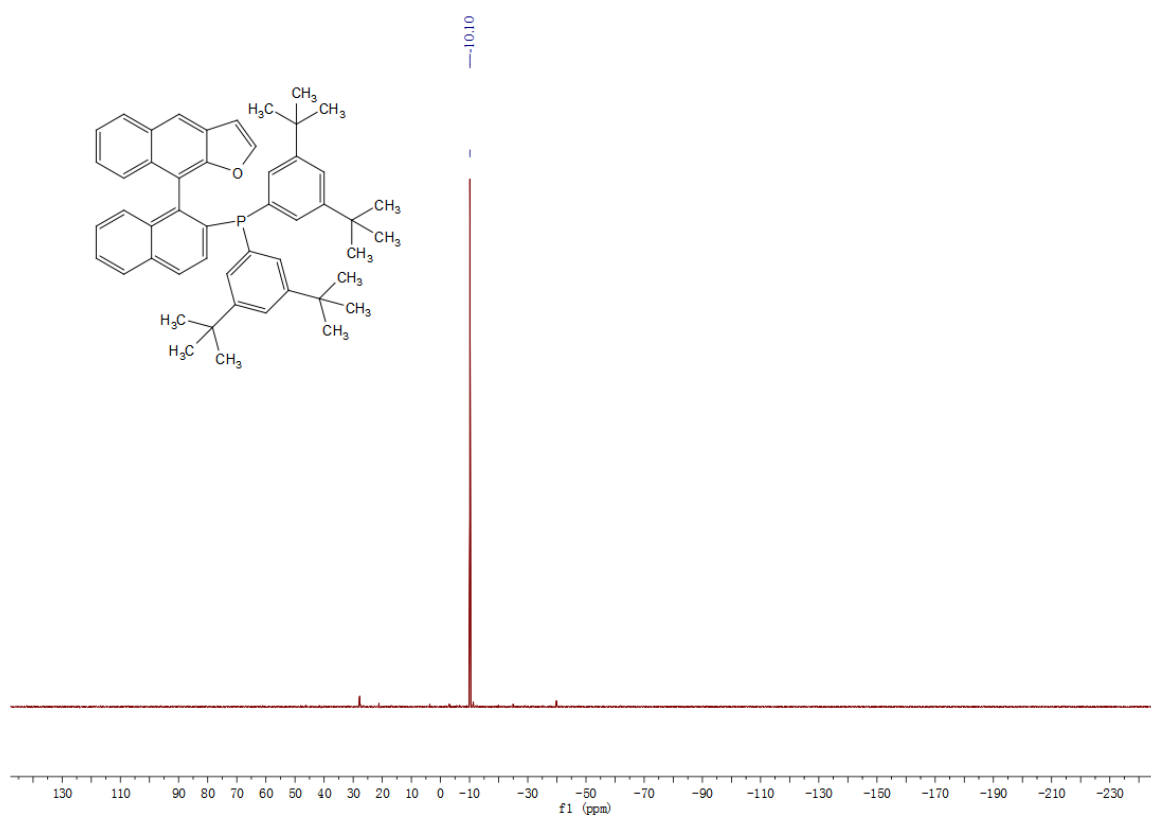

**bis(3,5-di-*tert*-butyl-4-methoxyphenyl)(1-(naphtho[2,3-*b*]furan-9-yl)naphthalen-2-yl)phosphine (L5):**

<sup>1</sup>H-NMR (400 MHz, CDCl<sub>3</sub>)

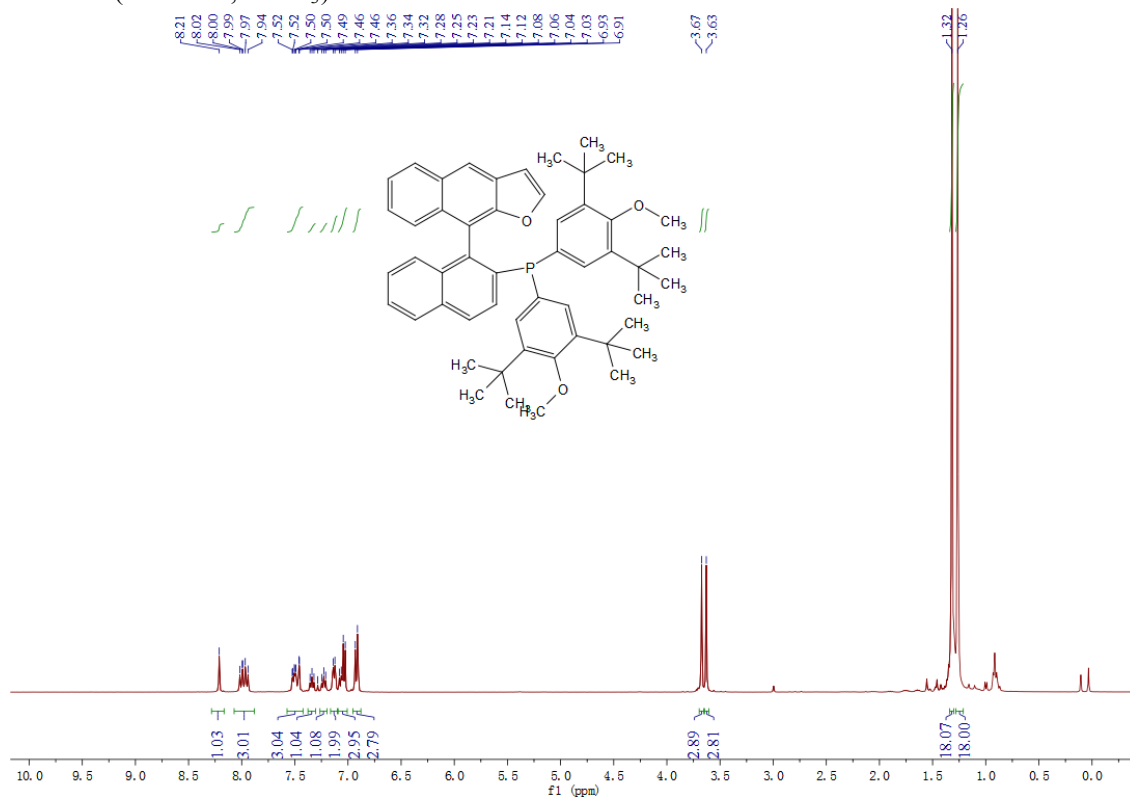

<sup>13</sup>C-NMR (101 MHz, CDCl<sub>3</sub>)

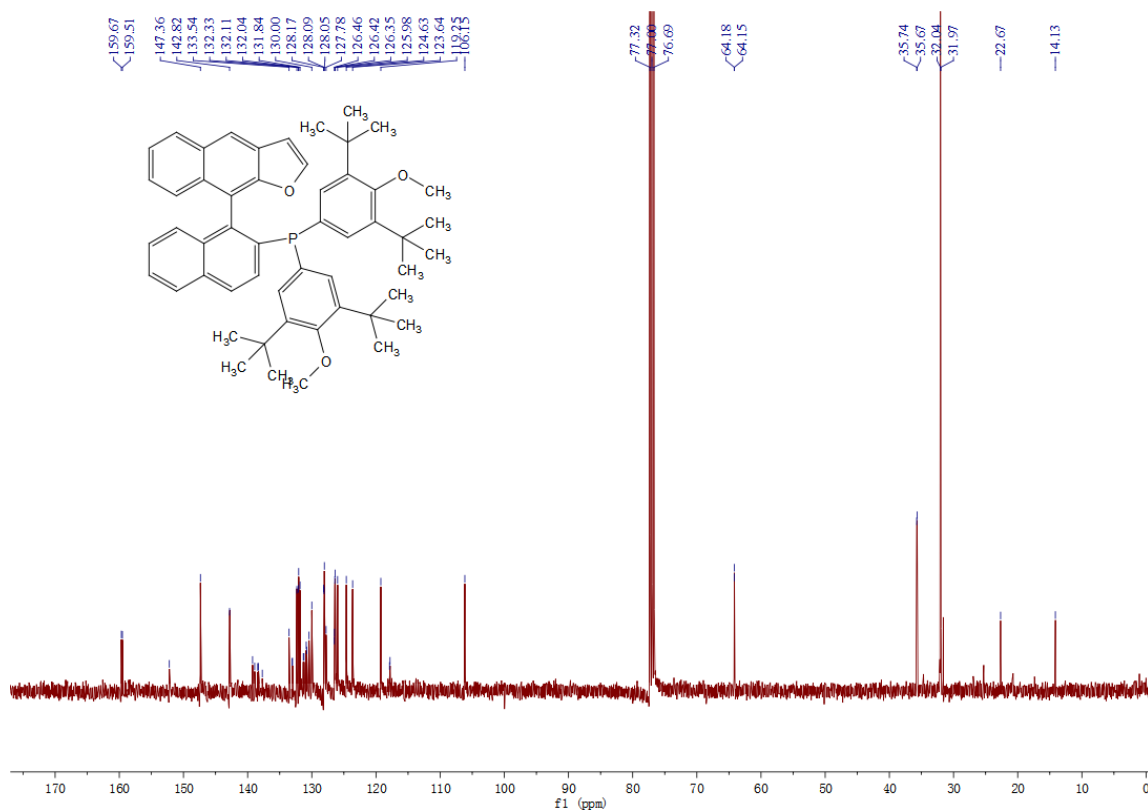

$^{31}\text{P}$  NMR (162 MHz,  $\text{CDCl}_3$ )

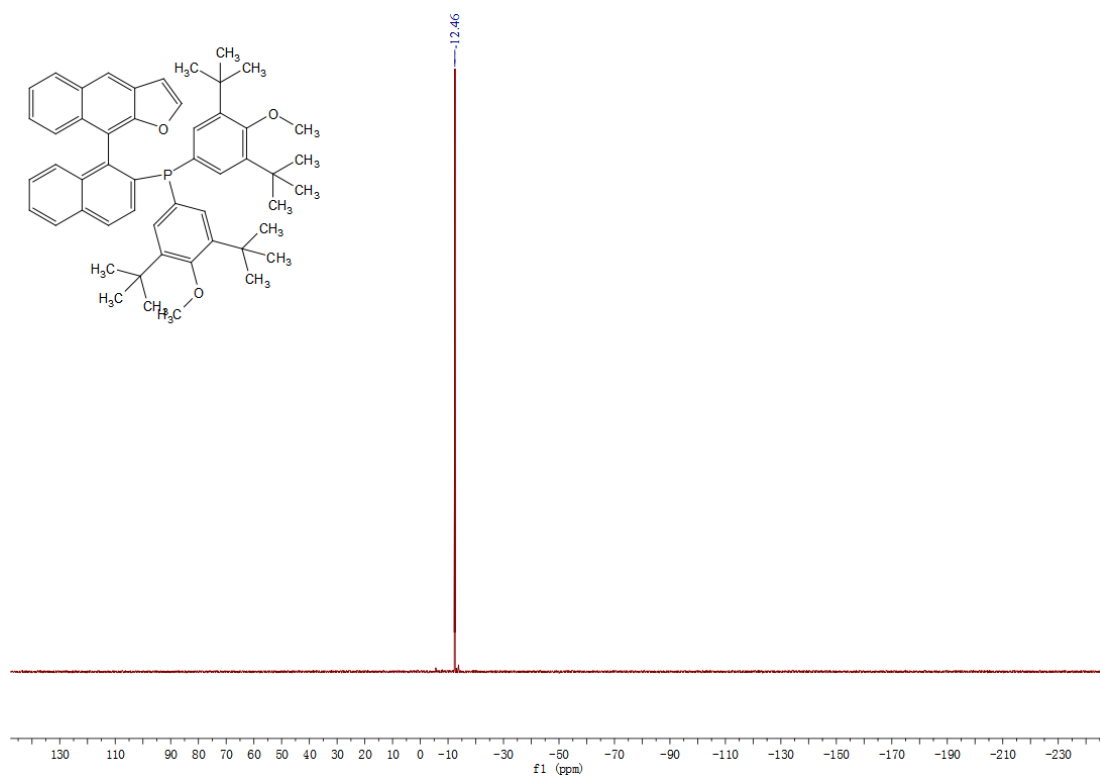

**dicyclohexyl(1-(naphtho[2,3-b]furan-9-yl)naphthalen-2-yl)phosphine (L6):**

$^1\text{H}$ -NMR (400 MHz,  $\text{CDCl}_3$ )

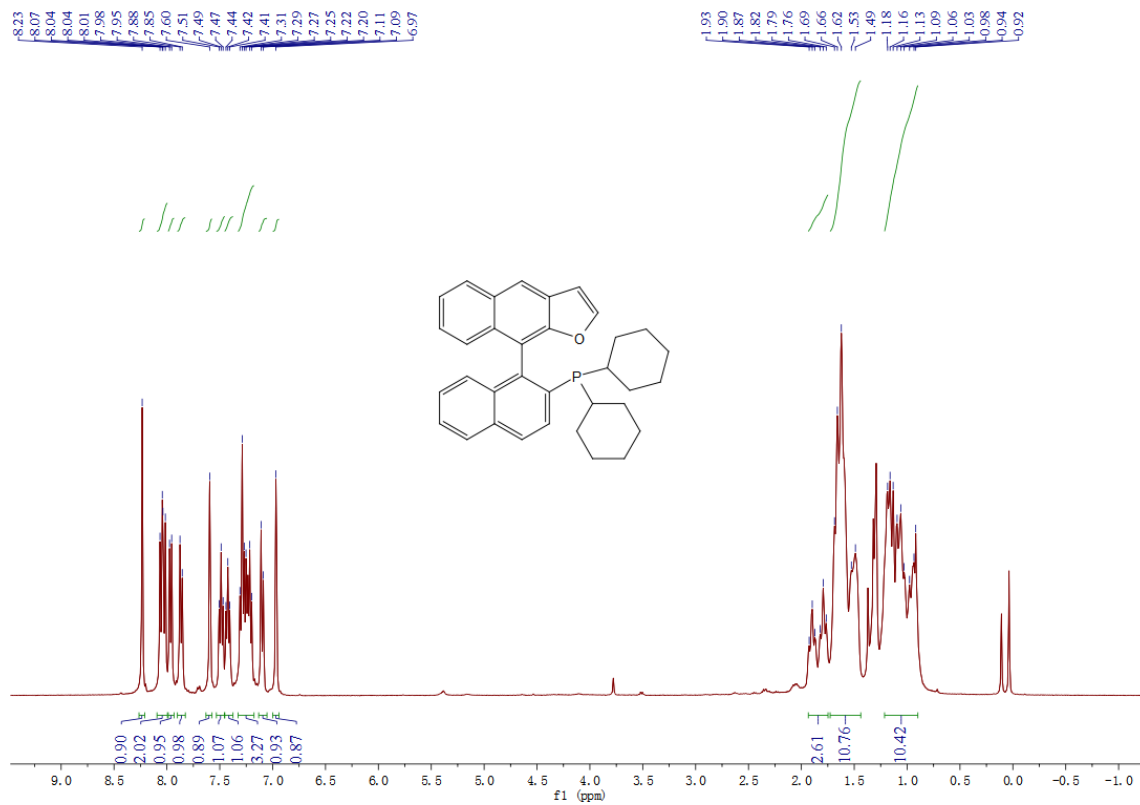

$^{13}\text{C}$ -NMR (101 MHz,  $\text{CDCl}_3$ )

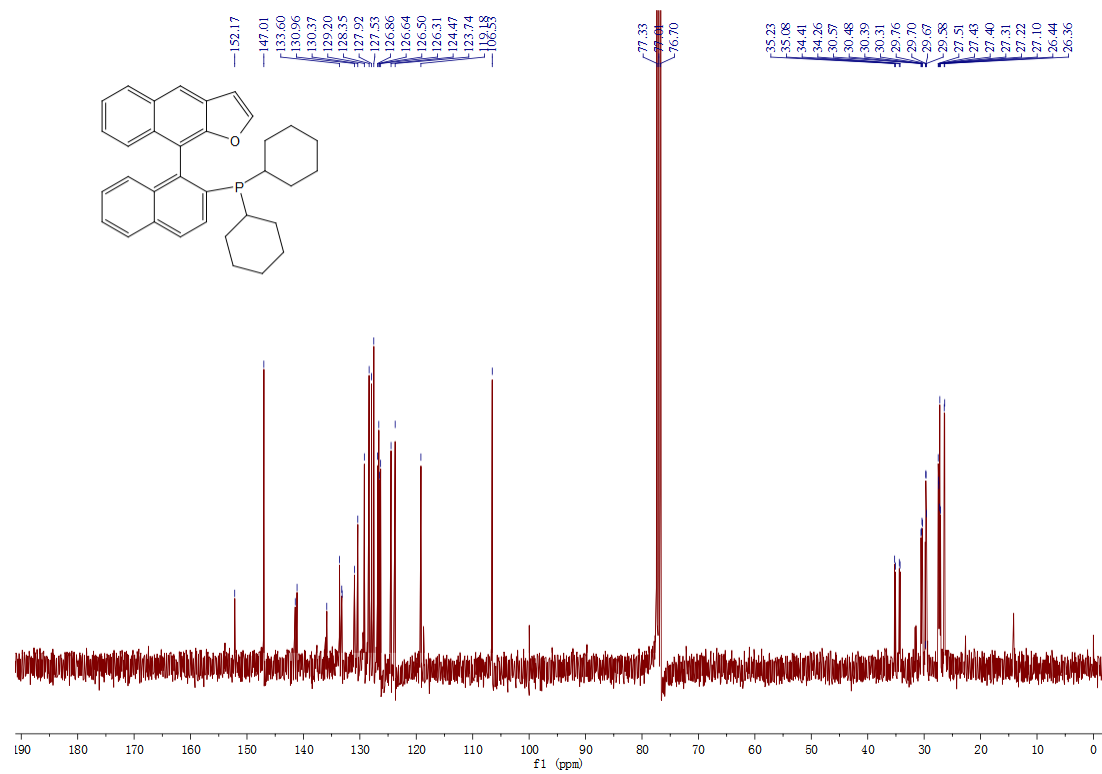

$^{31}\text{P}$  NMR (162 MHz,  $\text{CDCl}_3$ )

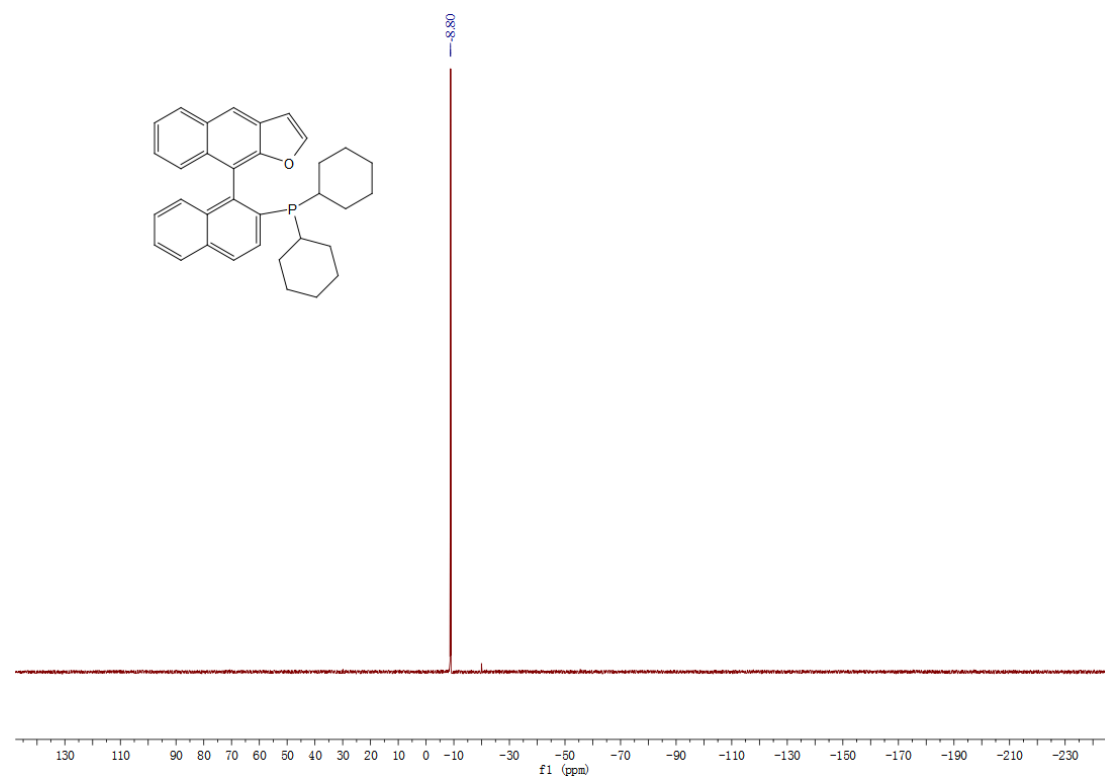

### 1-(2-ethoxyphenyl)-2-methoxynaphthalene (AB<sub>1</sub>):

<sup>1</sup>H-NMR (400 MHz, CDCl<sub>3</sub>)

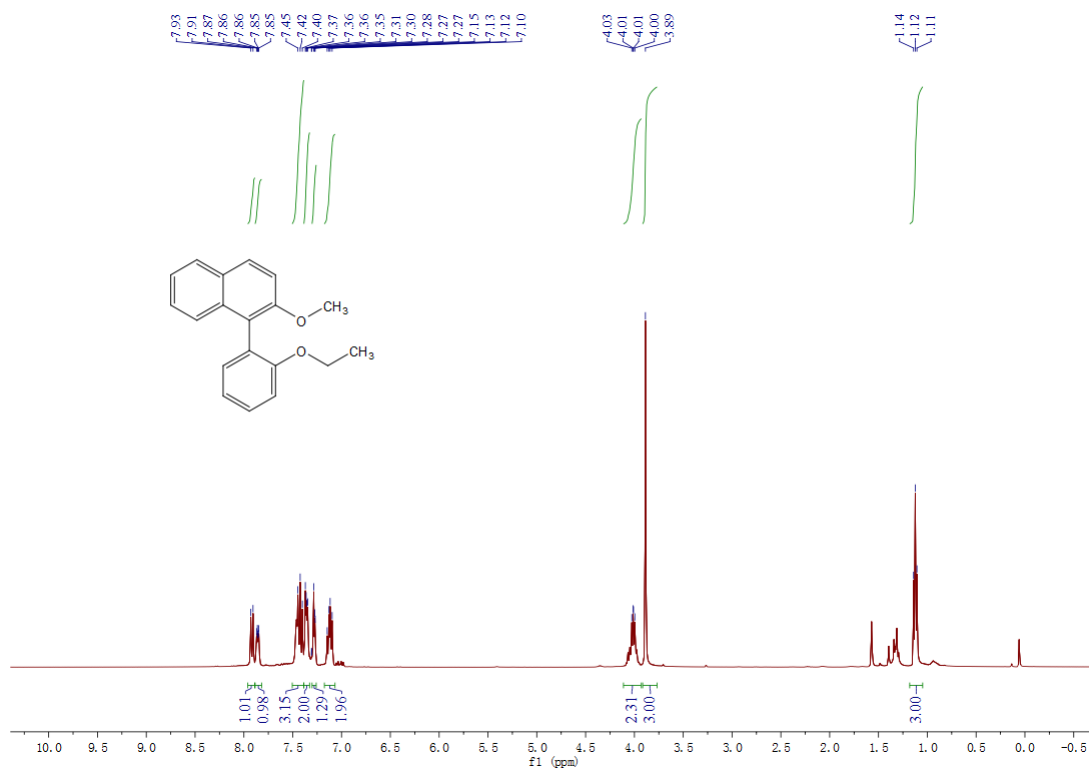

<sup>13</sup>C-NMR (101 MHz, CDCl<sub>3</sub>)

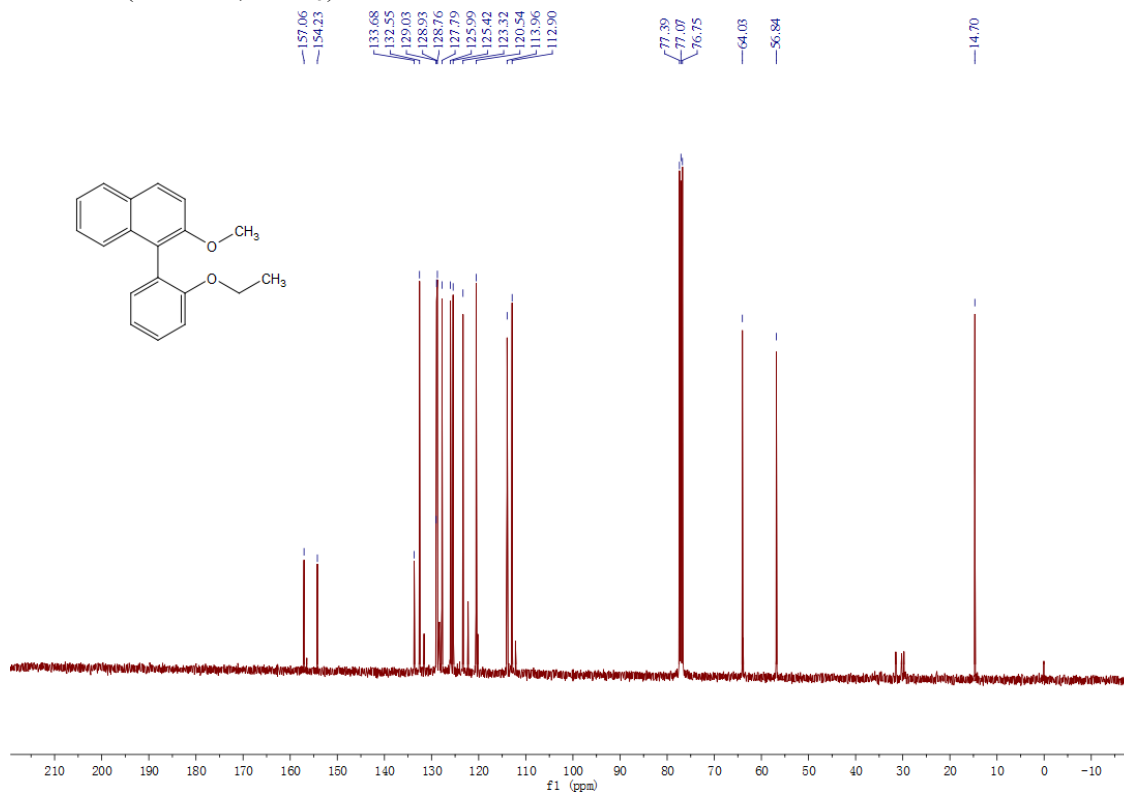

**methyl 3-(2-methoxynaphthalen-1-yl)benzoate (AB<sub>14</sub>):**

<sup>1</sup>H-NMR (400 MHz, CDCl<sub>3</sub>)

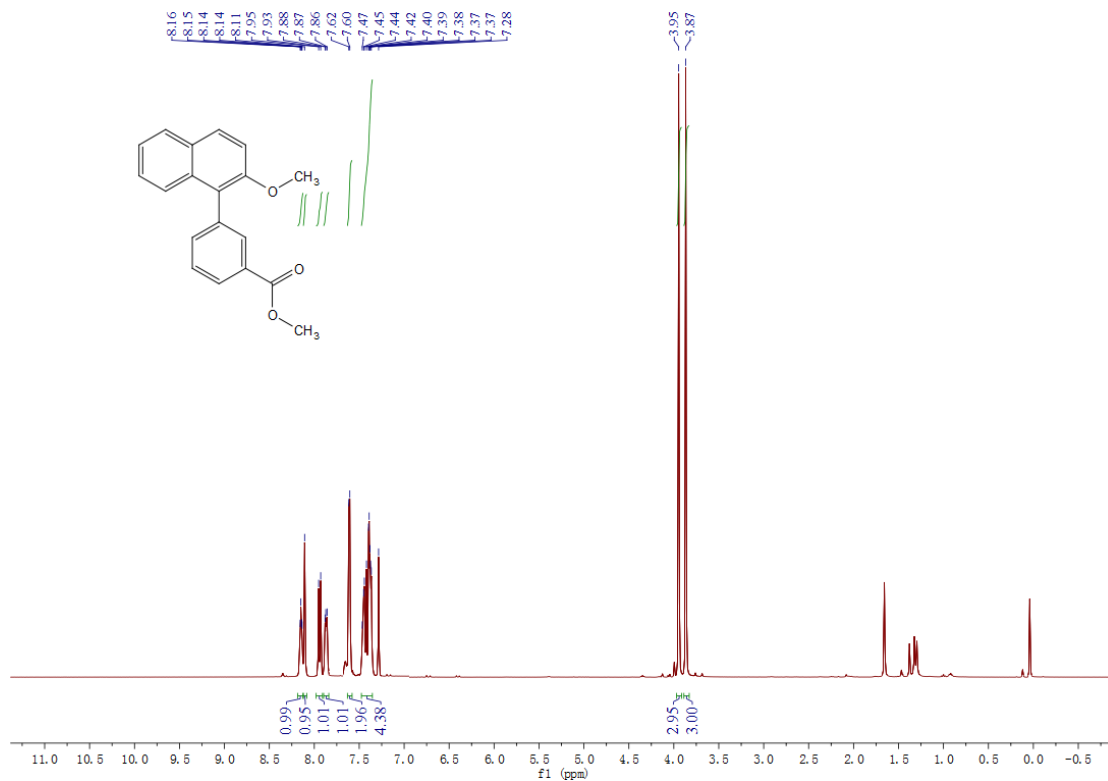

<sup>13</sup>C-NMR (101 MHz, CDCl<sub>3</sub>)

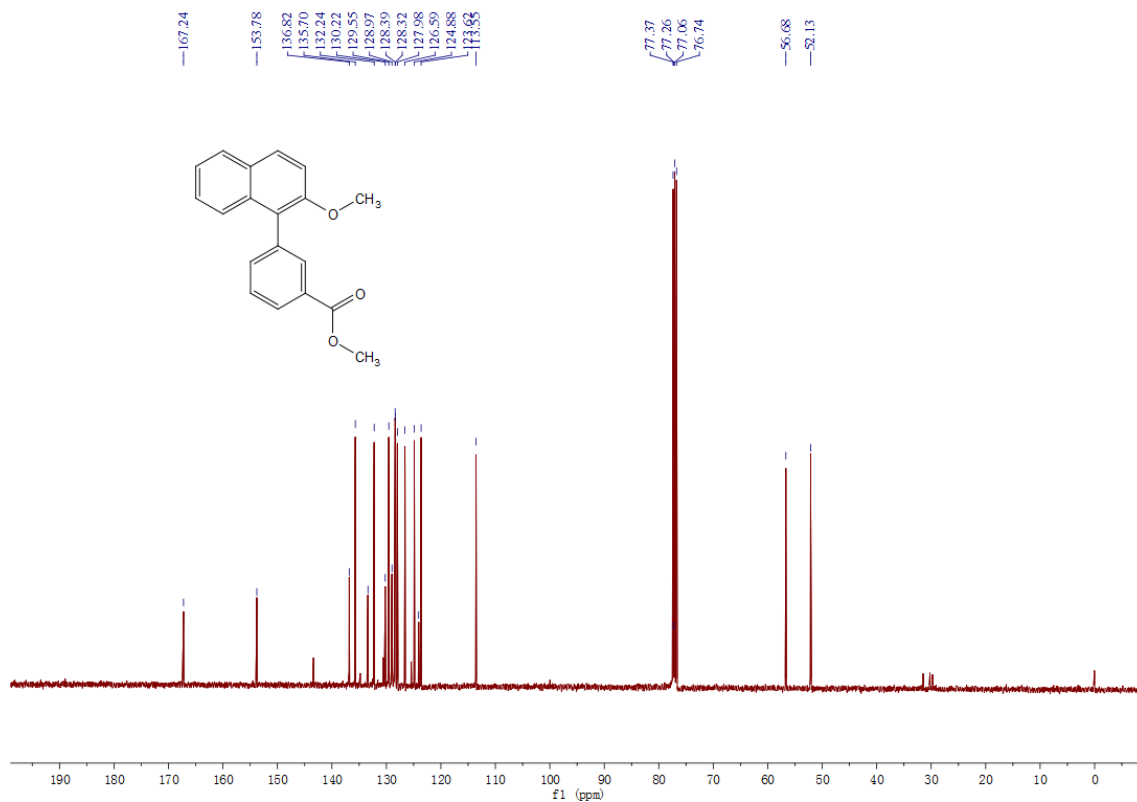

# 1-cyclopropyl-2-methoxynaphthalene (AB<sub>15</sub>):

<sup>1</sup>H-NMR (400 MHz, CDCl<sub>3</sub>)

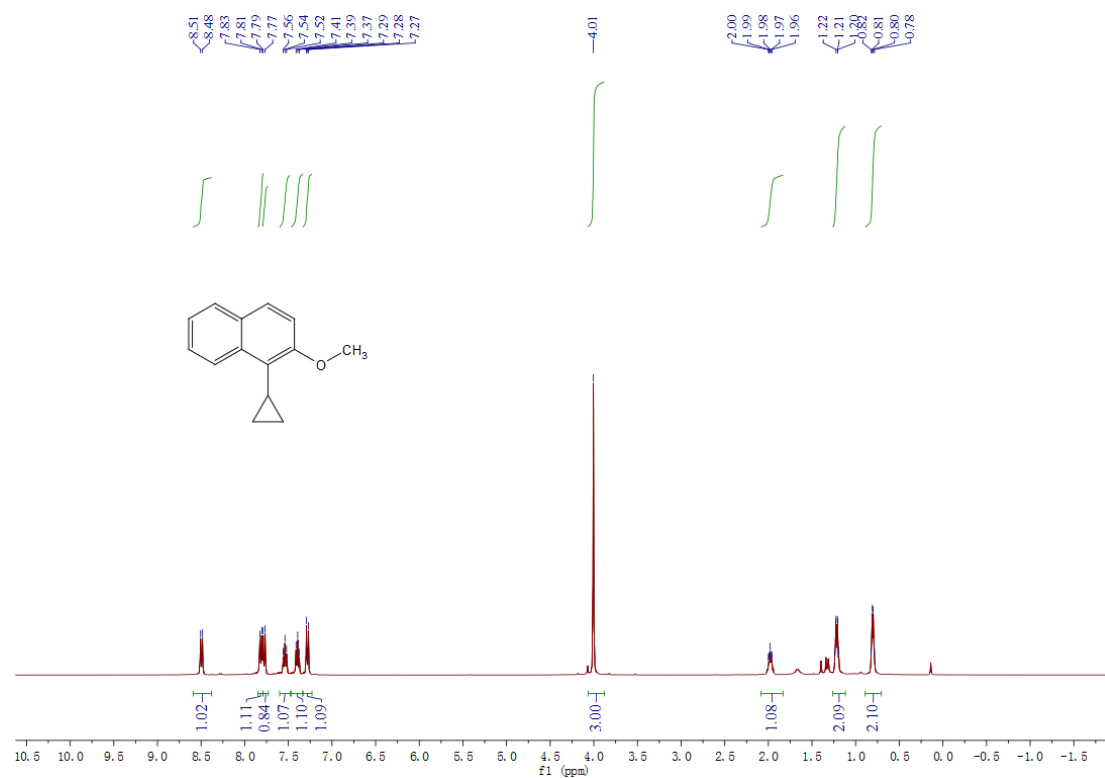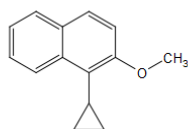

<sup>13</sup>C-NMR (101 MHz, CDCl<sub>3</sub>)

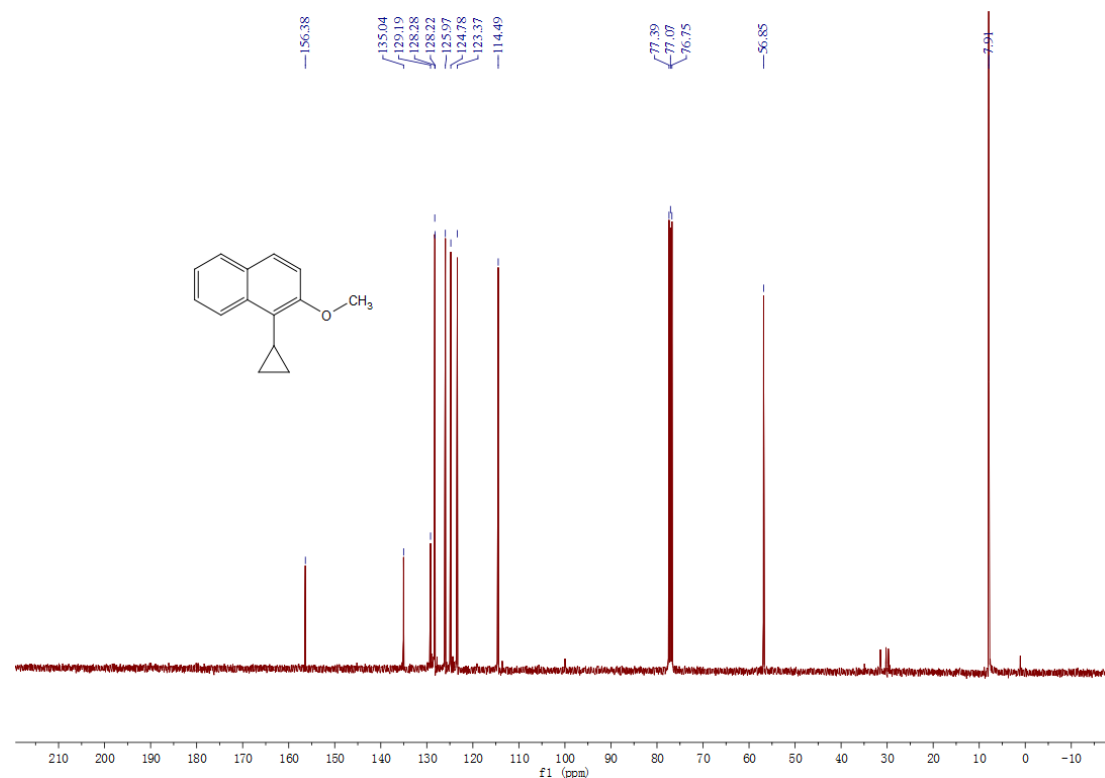

### 1-butyl-2-methoxynaphthalene (AB<sub>16</sub>):

<sup>1</sup>H-NMR (400 MHz, CDCl<sub>3</sub>)

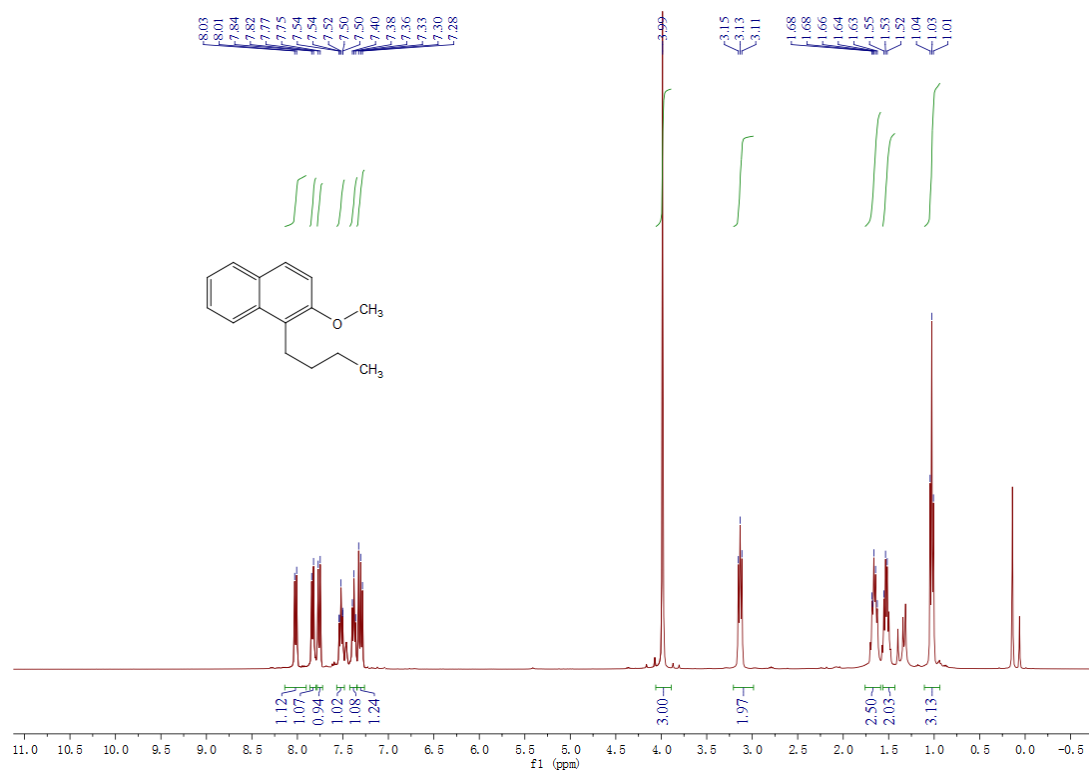

<sup>13</sup>C-NMR (101 MHz, CDCl<sub>3</sub>)

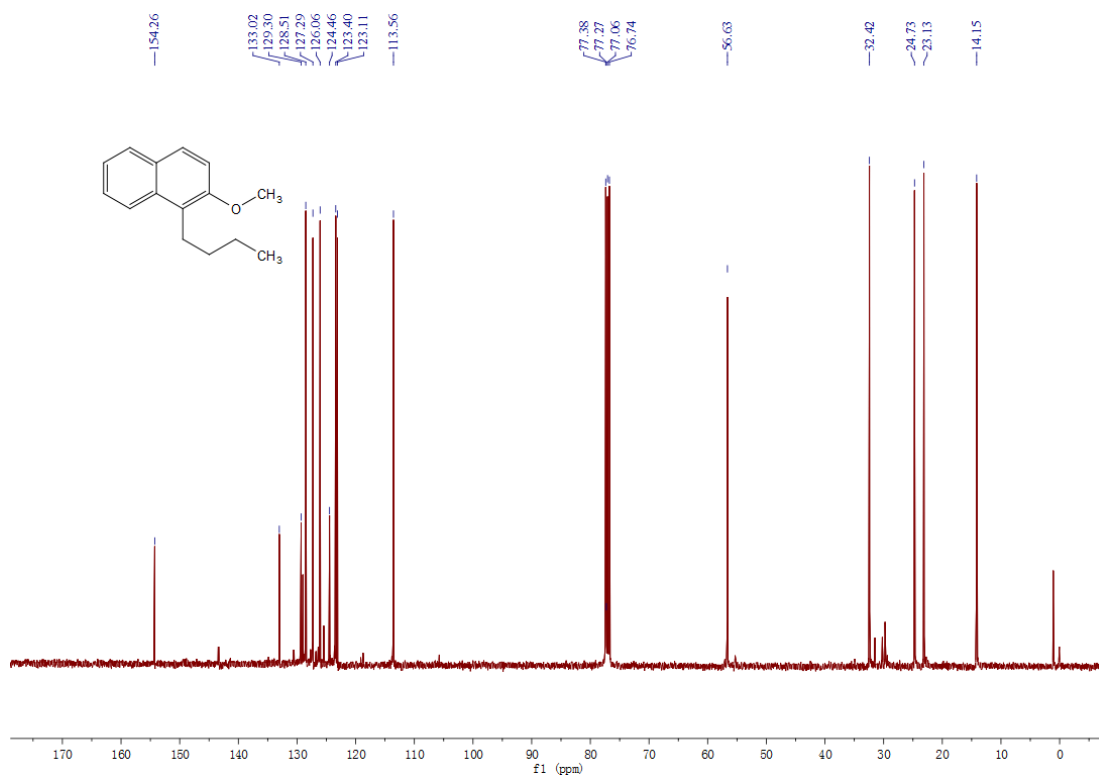



### 2-methoxy-5-(2-methoxynaphthalen-1-yl)pyridine (AB<sub>18</sub>):

<sup>1</sup>H-NMR (400 MHz, CDCl<sub>3</sub>)

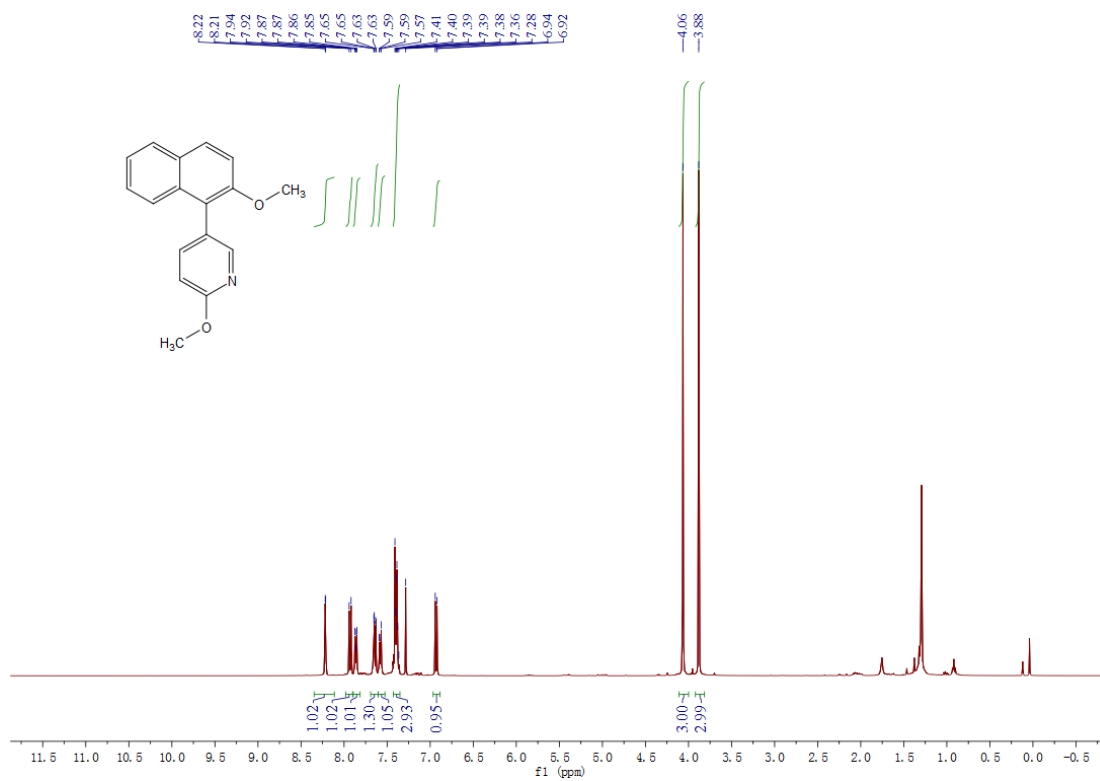

<sup>13</sup>C-NMR (101 MHz, CDCl<sub>3</sub>)

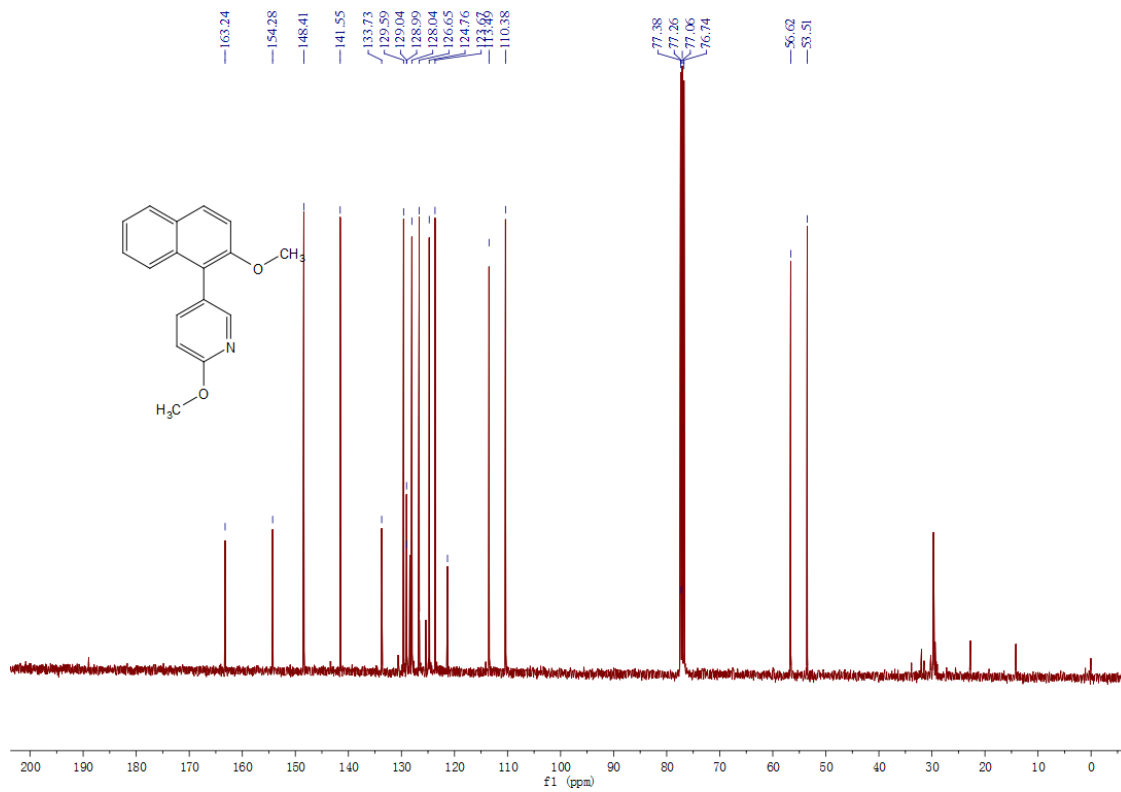

### 2-(2-(naphthalen-1-yl)phenyl)acetonitrile (A4B):

$^1\text{H-NMR}$  (400 MHz,  $\text{CDCl}_3$ )

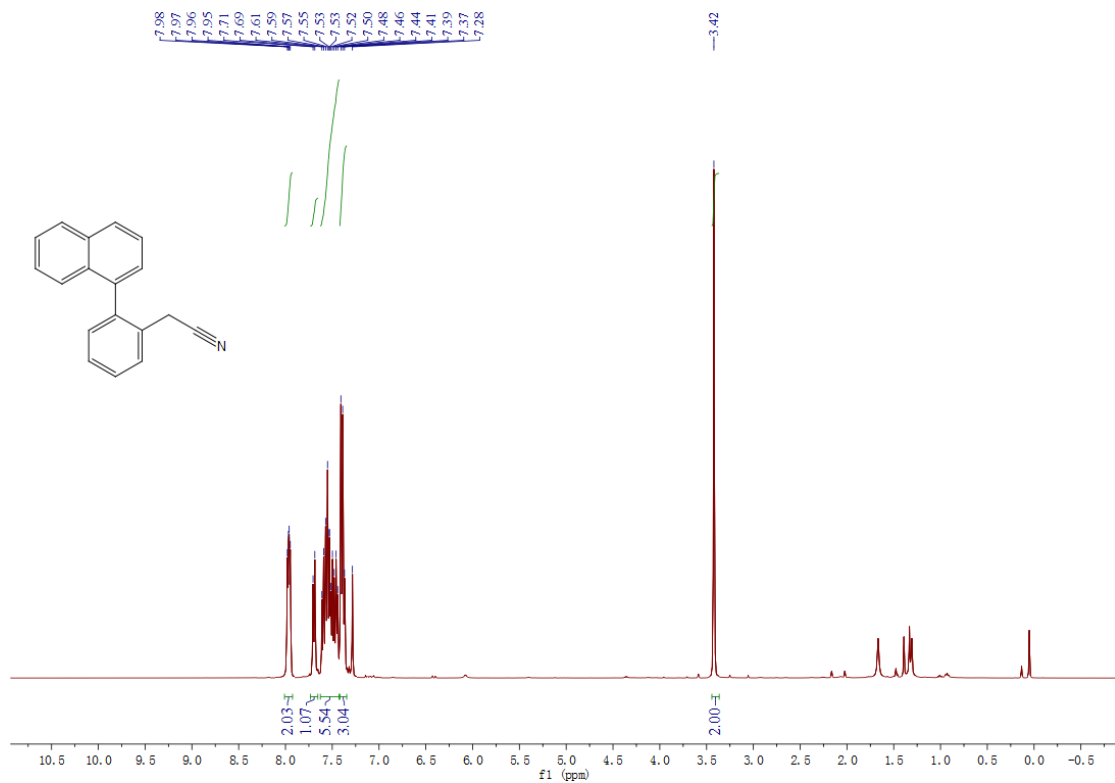

$^{13}\text{C-NMR}$  (101 MHz,  $\text{CDCl}_3$ )

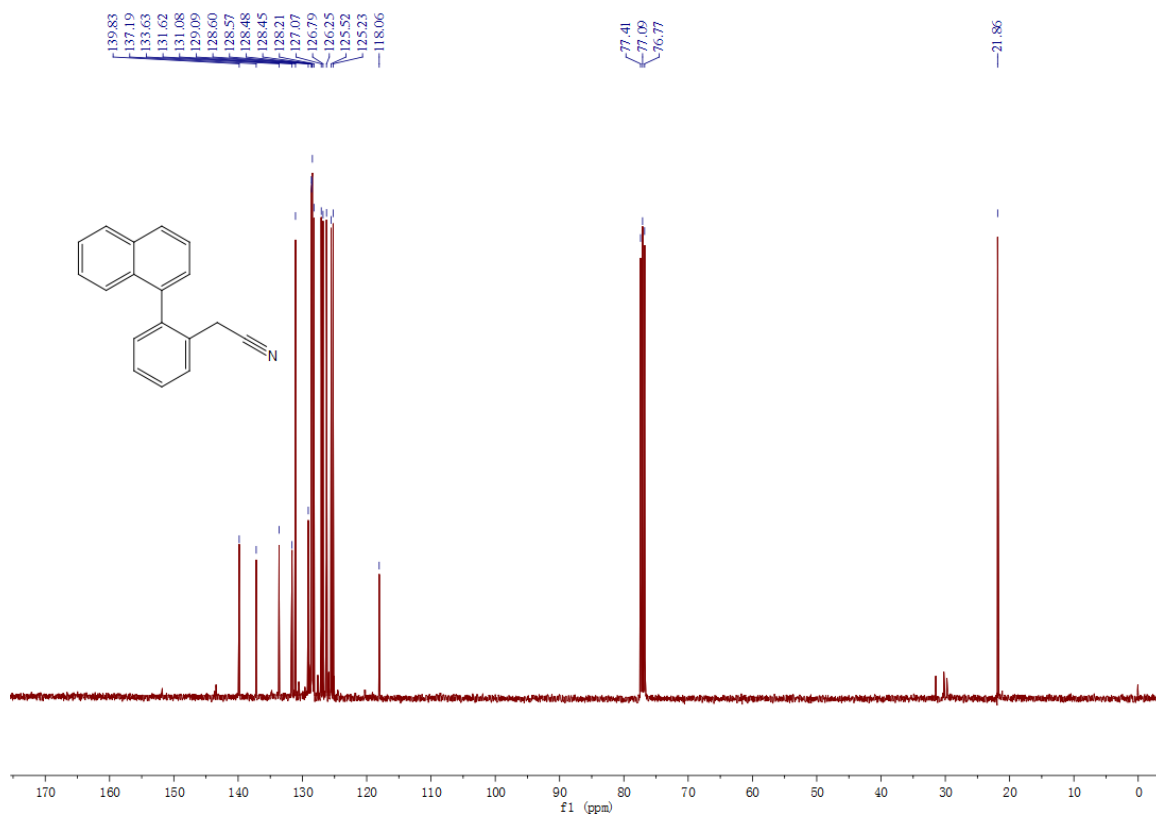

### 3-(benzyloxy)-2-(naphthalen-1-yl)benzaldehyde (A<sub>12</sub>B):

<sup>1</sup>H-NMR (400 MHz, CDCl<sub>3</sub>)

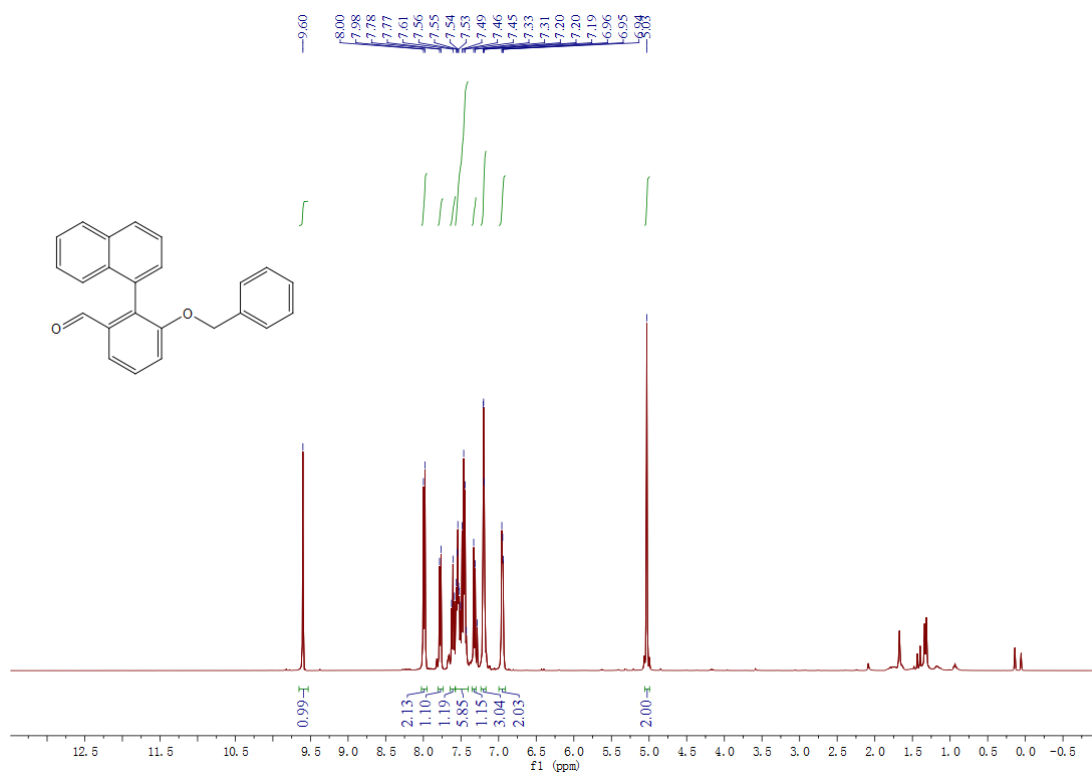

<sup>13</sup>C-NMR (101 MHz, CDCl<sub>3</sub>)

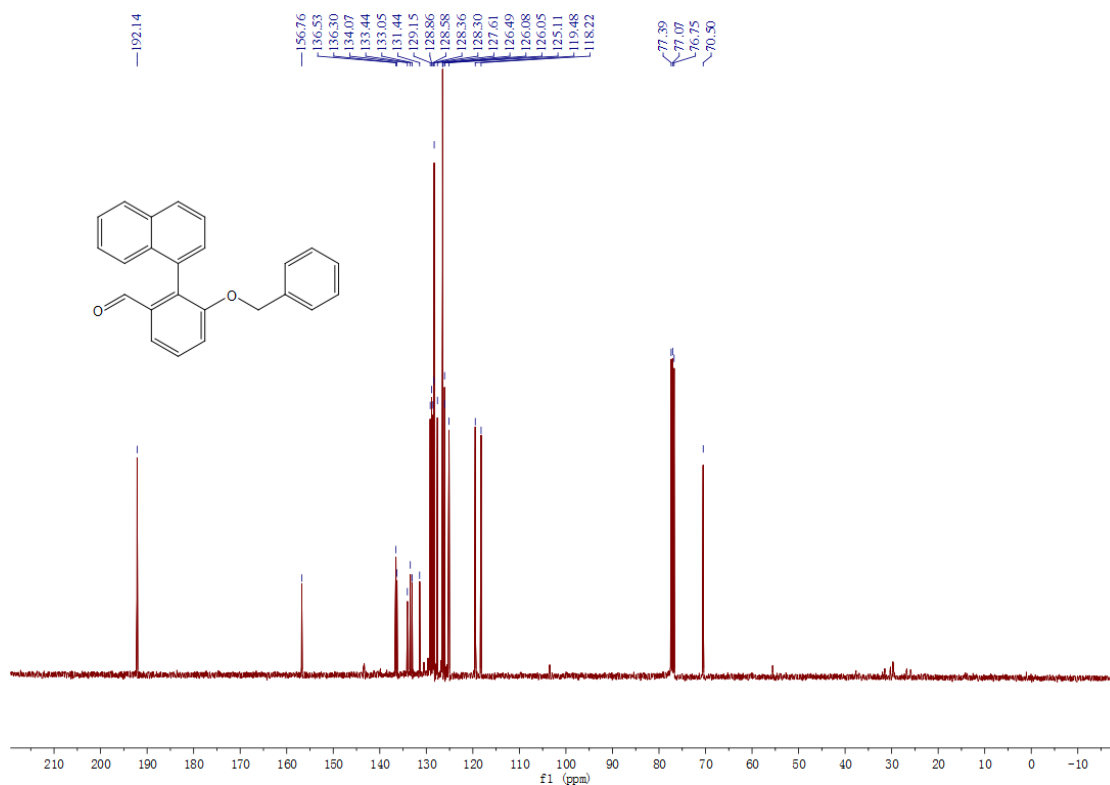

### 6-methoxy-5-(naphthalen-1-yl)quinoline (A<sub>14</sub>B):

<sup>1</sup>H-NMR (400 MHz, CDCl<sub>3</sub>)

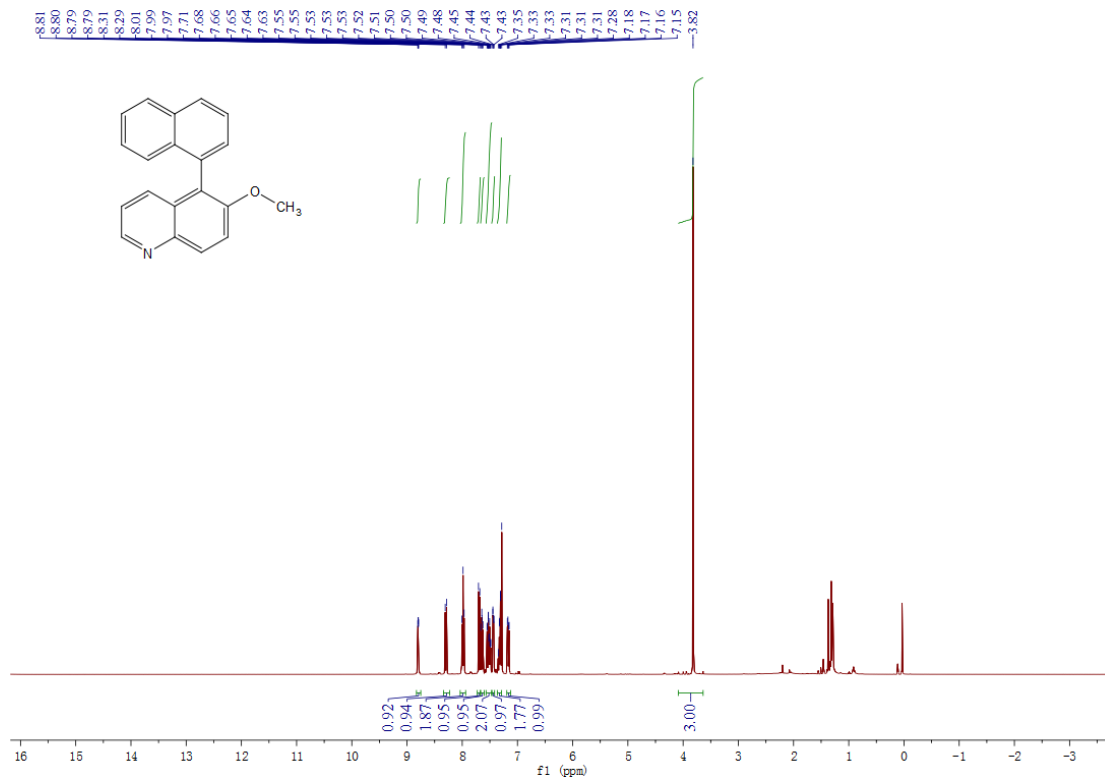

<sup>13</sup>C-NMR (101 MHz, CDCl<sub>3</sub>)

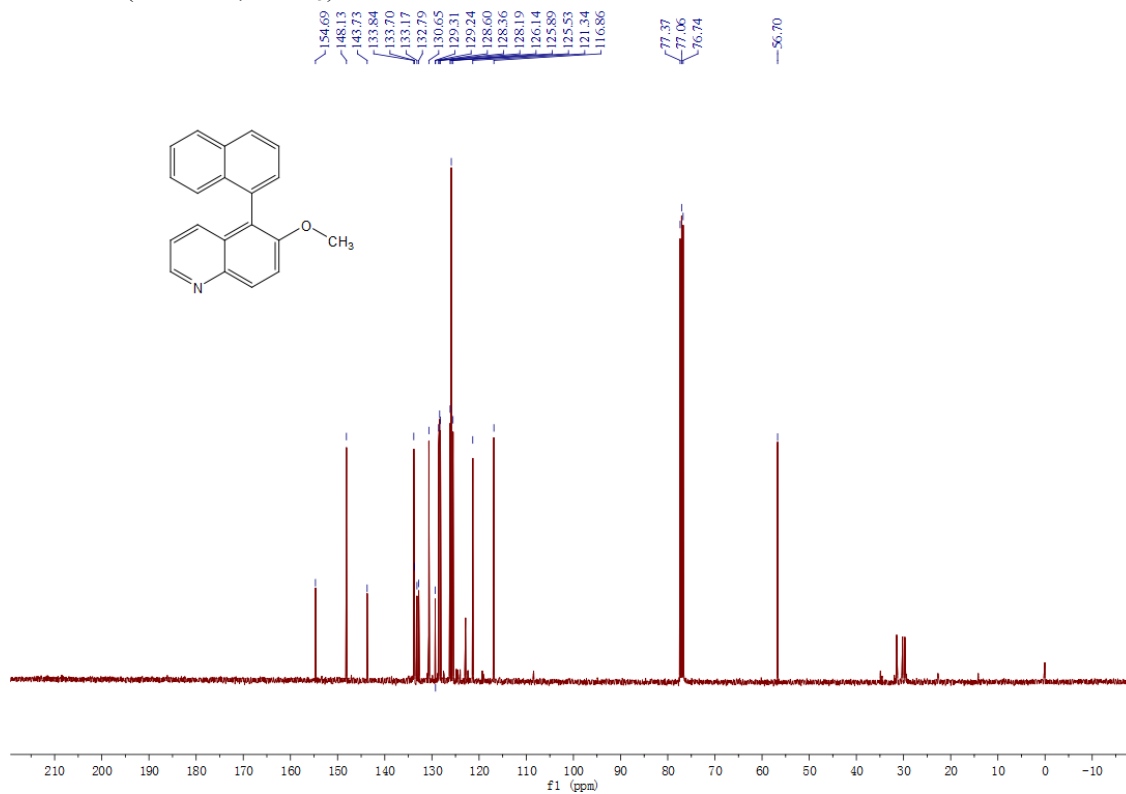

### 2-(1-methyl-3-(naphthalen-1-yl)-1H-indol-2-yl)-4-phenyl-4,5-dihydrooxazole (A<sub>16</sub>B):

<sup>1</sup>H-NMR (400 MHz, CDCl<sub>3</sub>)

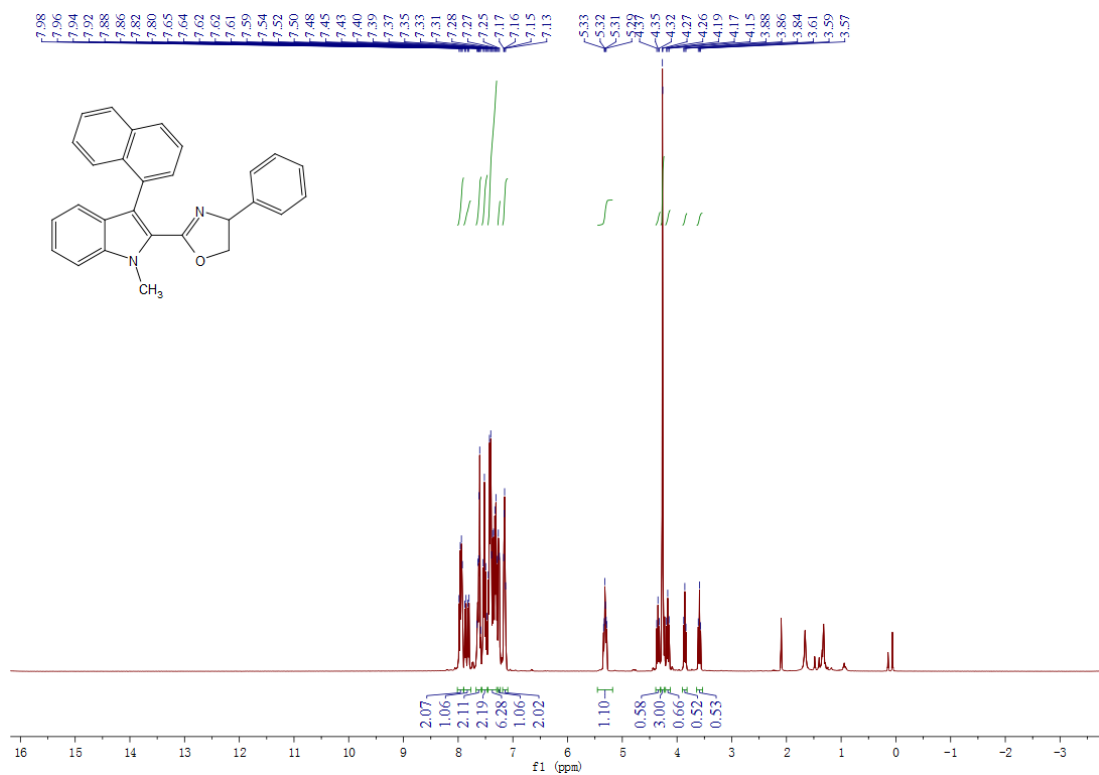

<sup>13</sup>C-NMR (101 MHz, CDCl<sub>3</sub>)

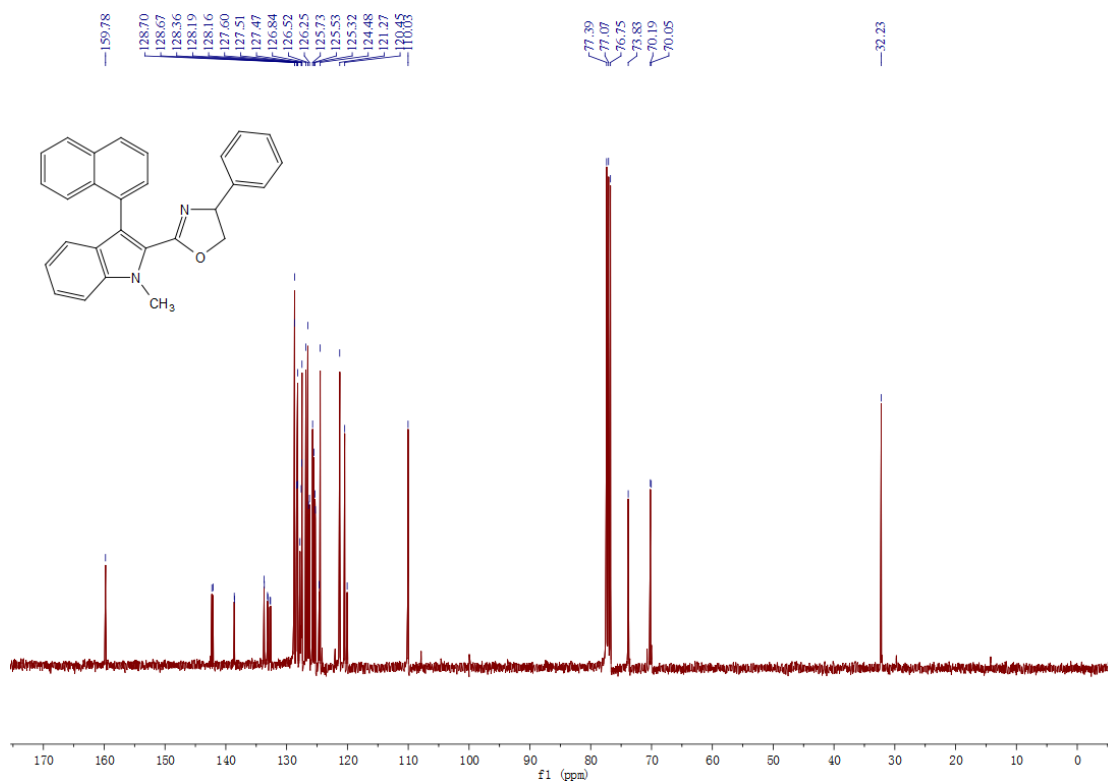

Supplement: c8nj00412a1.pdf [file c8nj00412a1.pdf]
